# Supplementary material
Source: publisher figshare collection journal article supplement (https://acs.figshare.com/ndownloader/files/5454014)

## *Supporting Information*

### **Visible-Light Initiated Na<sub>2</sub>-Eosin Y Catalyzed Highly Regio- and Stereoselective Difunctionalization of Alkynes with Alkyl Bromides**

Kuai Wang, Ling-Guo Meng,\* and Lei Wang\*

*Department of Chemistry, Huaibei Normal University, Huaibei, Anhui 235000, P. R. China*

*milig@126.com; leiwang@chnu.edu.cn*

#### *Table of Contents for Supporting Information*

---

|                                                                        |   |
|------------------------------------------------------------------------|---|
| 1. UV-Vis experiments .....                                            | 2 |
| 2. NOESY spectrum of compound <b>3bg</b> .....                         | 3 |
| 3. Correlative spectra of control experiments.....                     | 4 |
| 4. <sup>1</sup> H and <sup>13</sup> C NMR spectra of the products..... | 6 |

## 1. UV-Vis experiments

The UV-Vis measurement was performed with a  $\text{CH}_3\text{CN}$  solution of  $\text{Na}_2$ -eosin Y (100  $\mu\text{M}$ ).

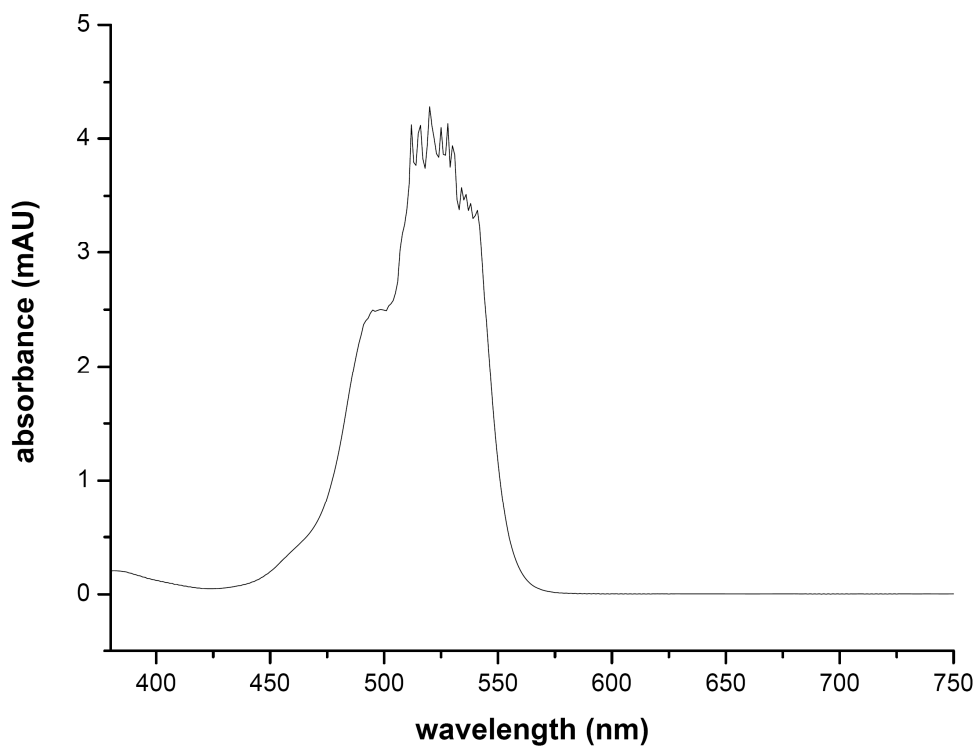

## 2. NOESY spectrum of compound **3bg**

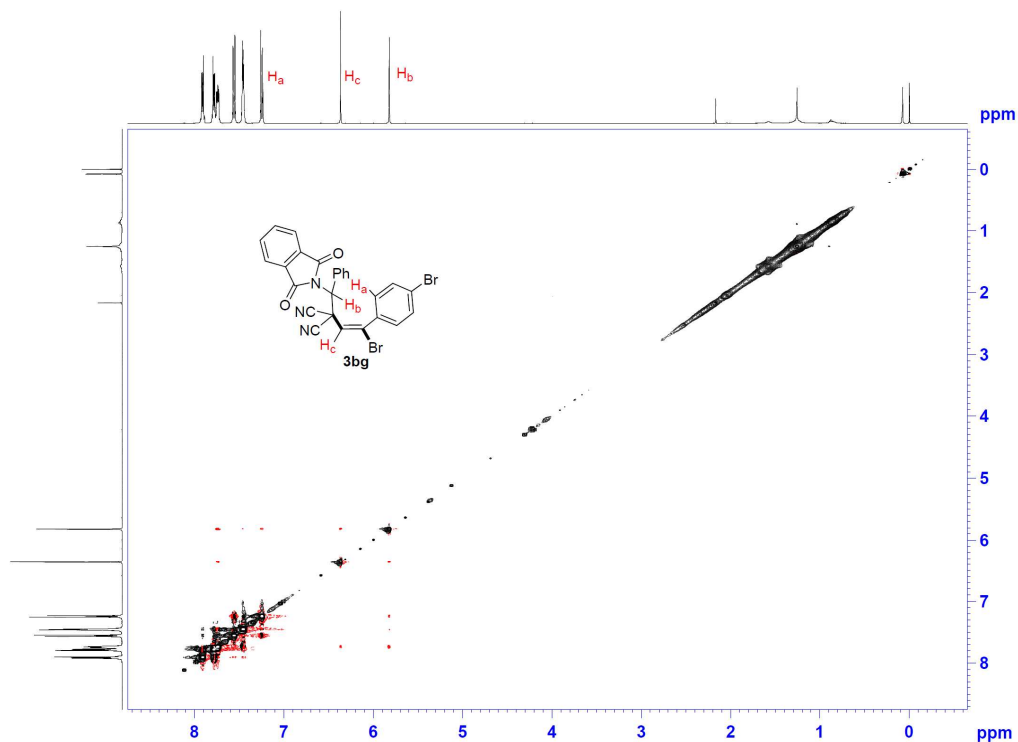

The (*E*)-configuration of the double bond can be confirmed by NOE experiments. In the NOESY spectrum of **3bg**, a cross peak of H<sub>a</sub> and H<sub>b</sub> was observed; but no NOE enhancements were appeared between H<sub>a</sub> and H<sub>c</sub>, which confirmed the relationship between these substituents.

### 3. Correlative spectra of control experiments

#### (a) The spectra of mixture of **3ac** and **3ac'**

The following spectra were obtained after the reaction was stirred in the presence of NIS or KI; the yields of **3ac** and **3ac'** were calculated based on the  $^1\text{H}$  NMR spectra analysis.

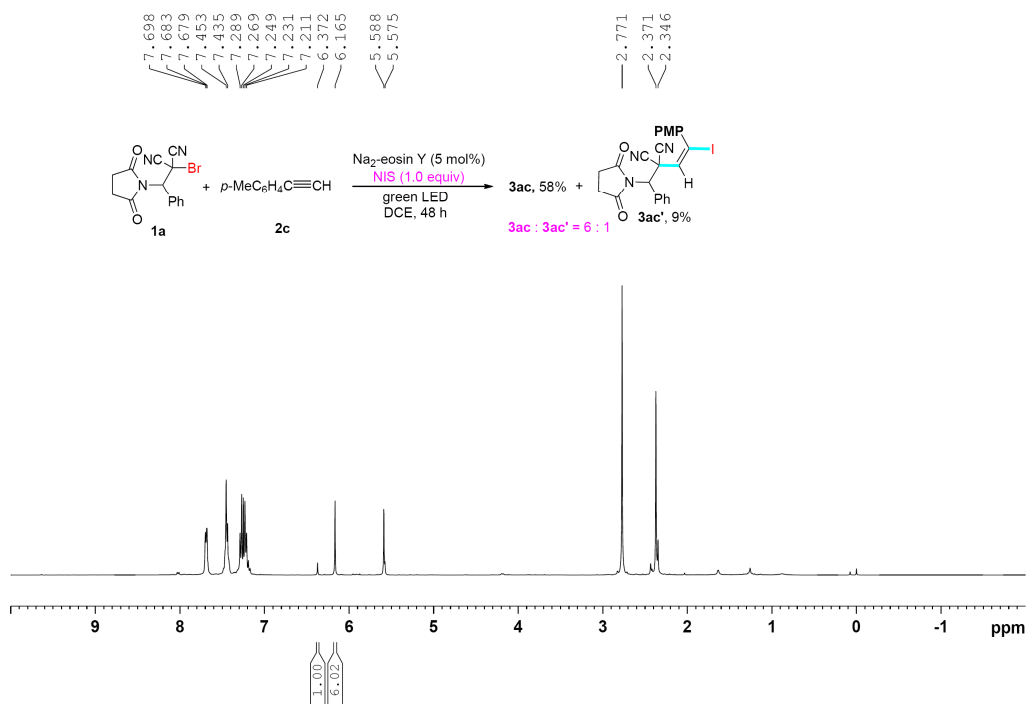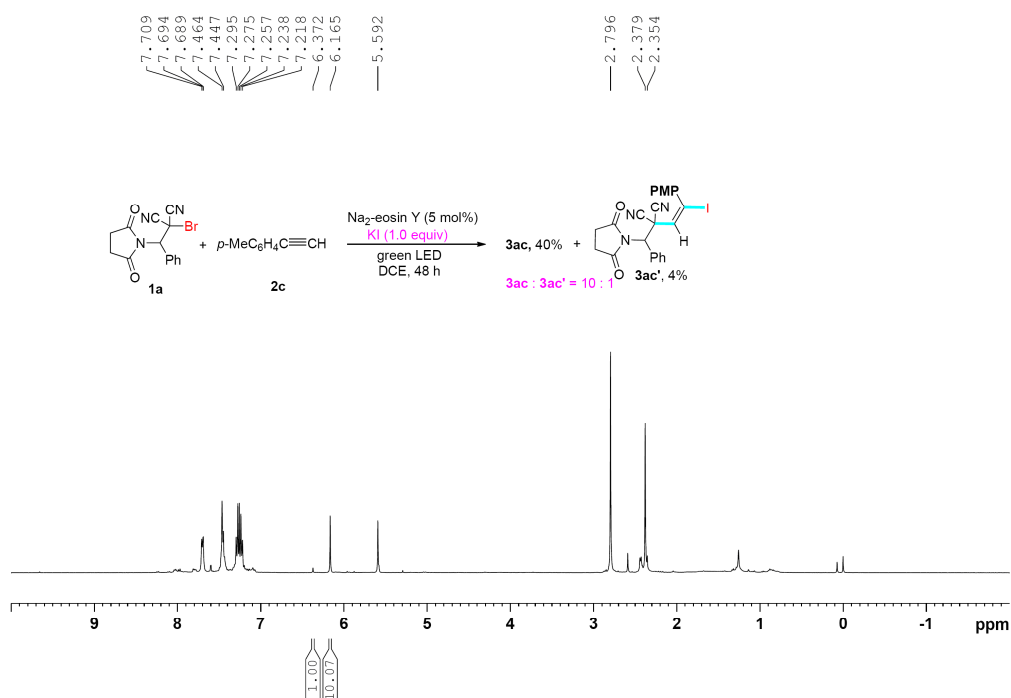

**(b) The HRMS spectra of mixture of **3ac** and **3ac'****

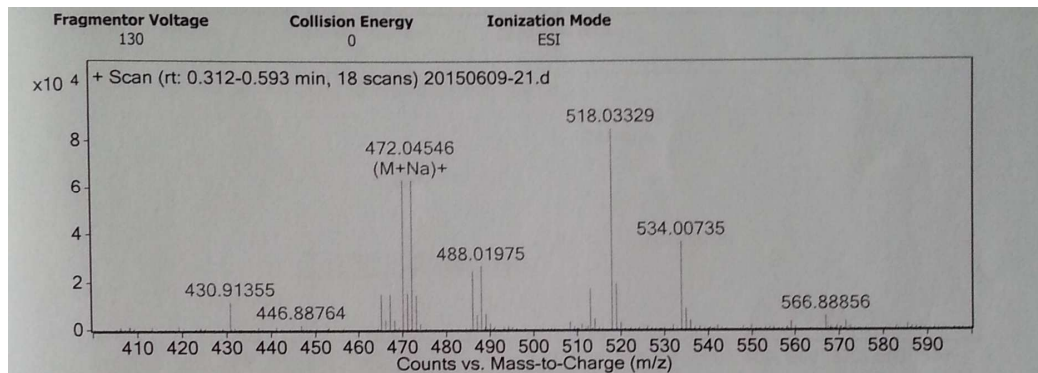

HRMS (ESI) calcd for **3ac**  $\text{C}_{23}\text{H}_{18}^{81}\text{BrN}_3\text{O}_3\text{Na}$   $(\text{M}+\text{Na})^+$ : 472.0460; Found: 472.0455.

HRMS (ESI) calcd for **3ac'**  $\text{C}_{23}\text{H}_{18}\text{IN}_3\text{O}_3\text{Na}$   $(\text{M}+\text{Na})^+$ : 518.0341; Found: 518.0333.

#### 4. $^1\text{H}$ and $^{13}\text{C}$ NMR spectra of the products

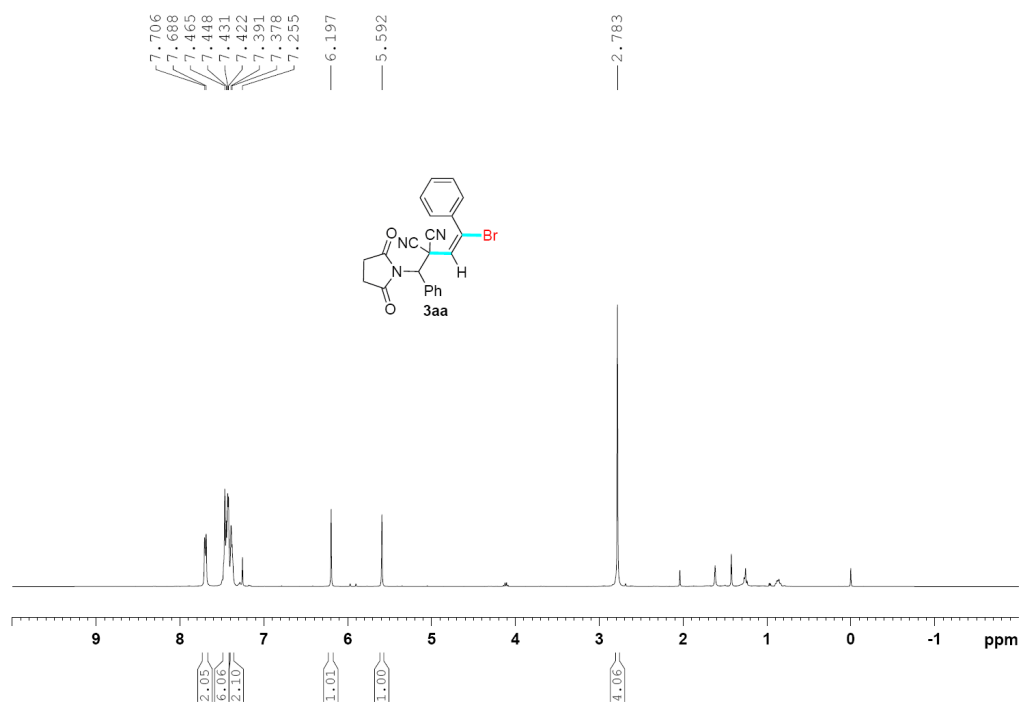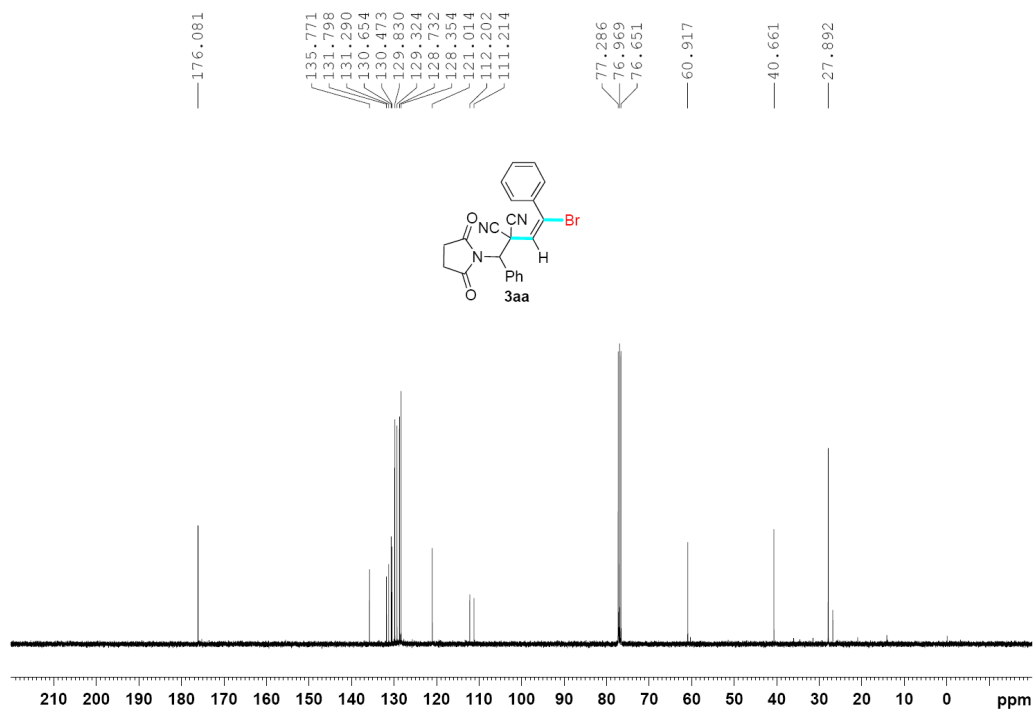

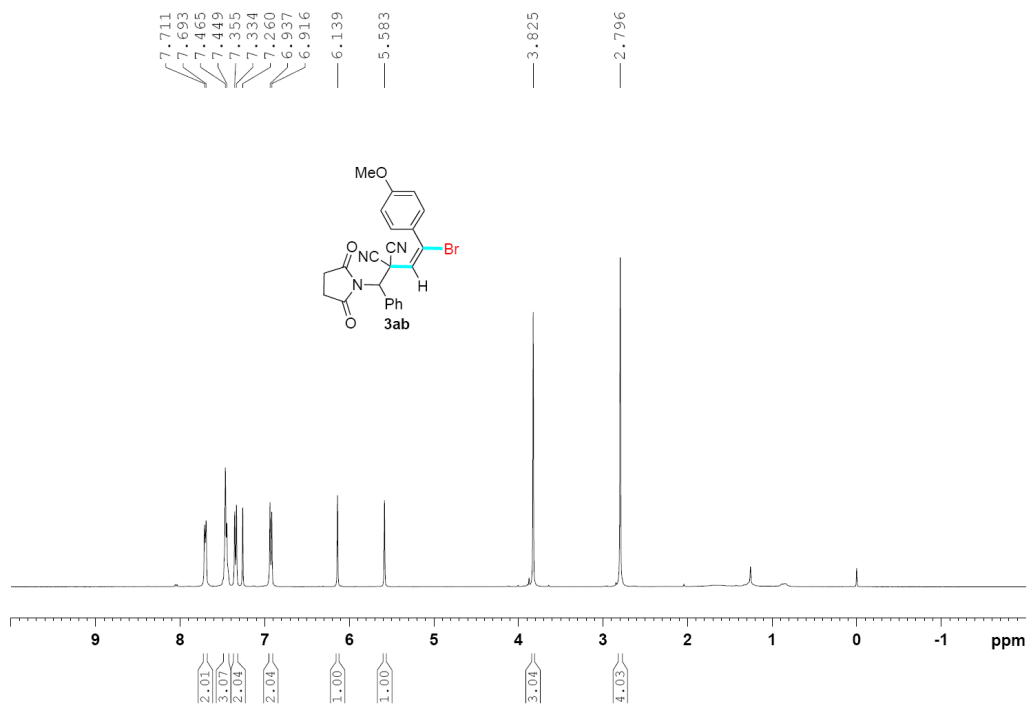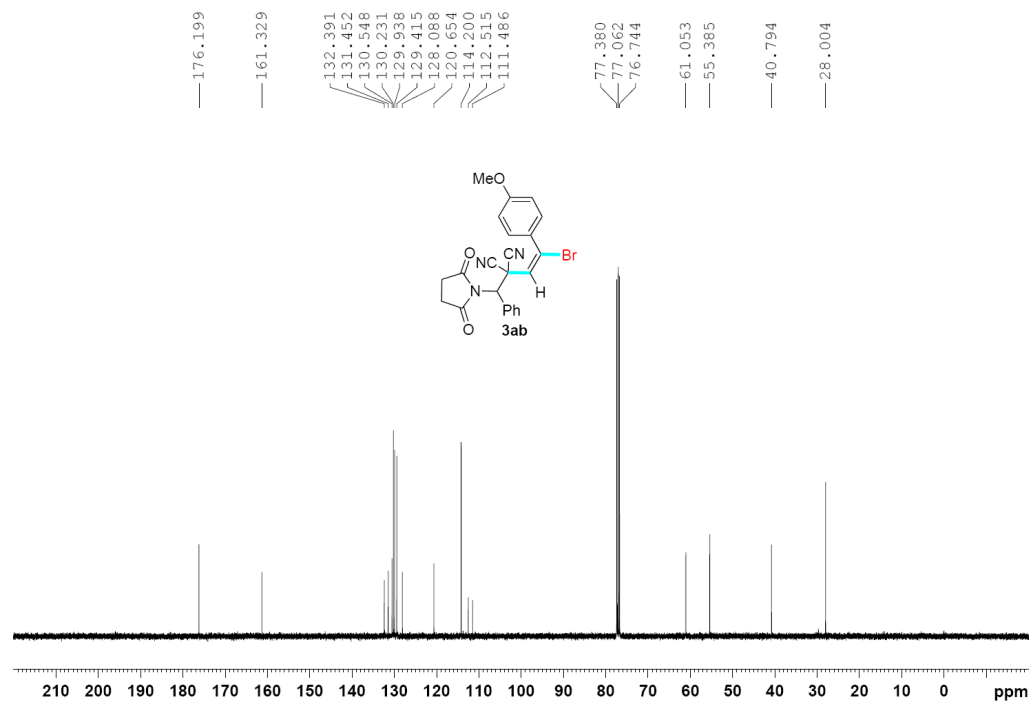

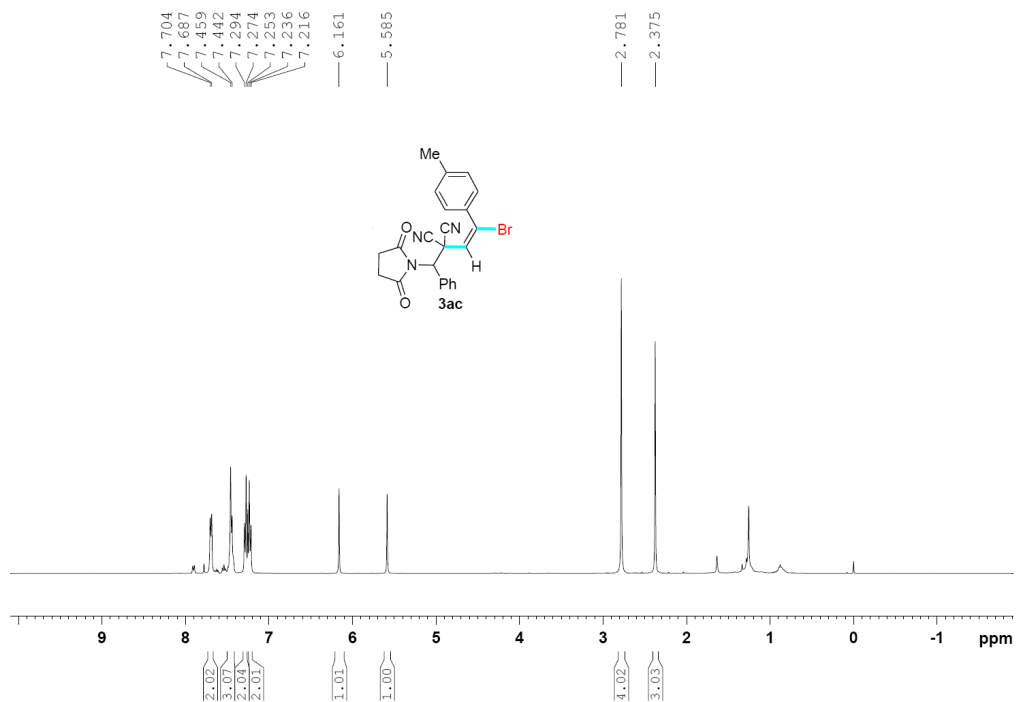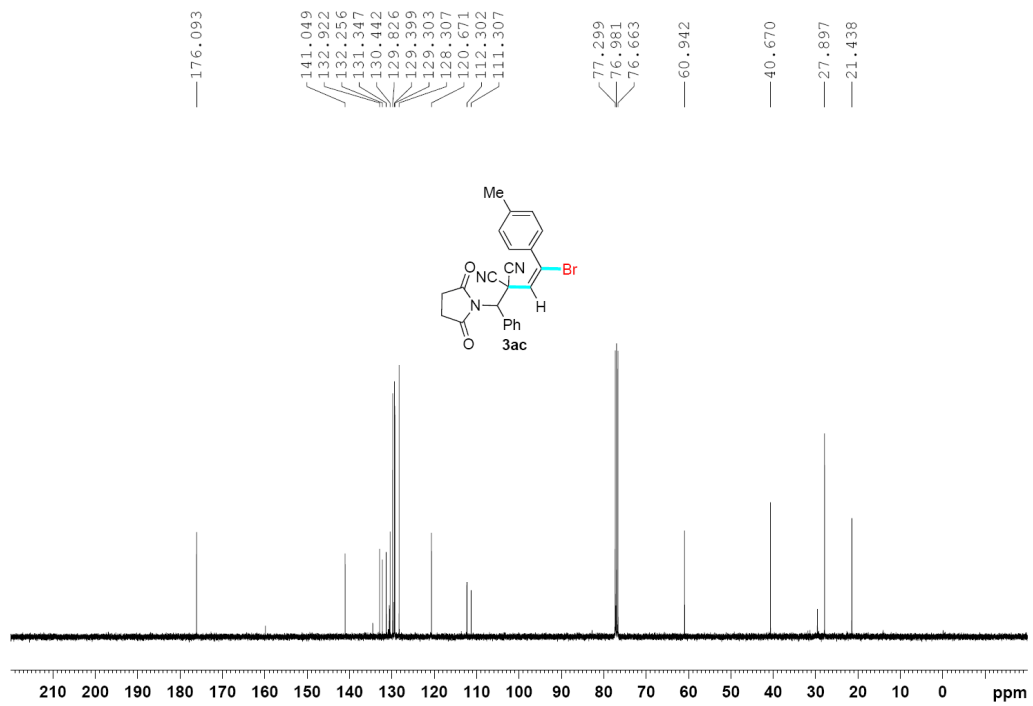

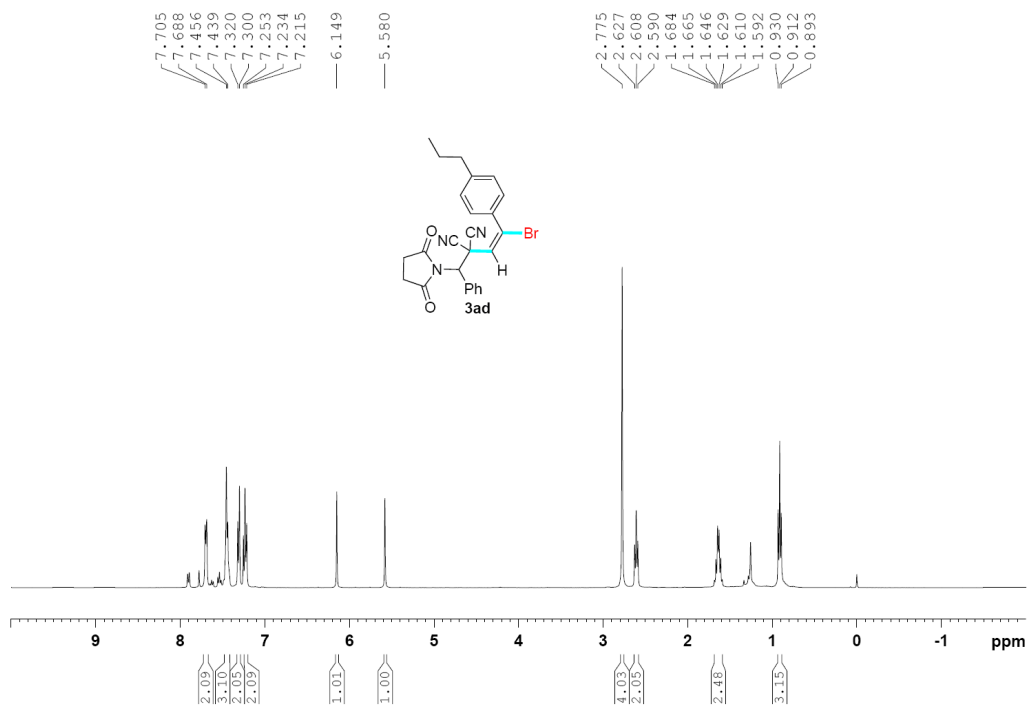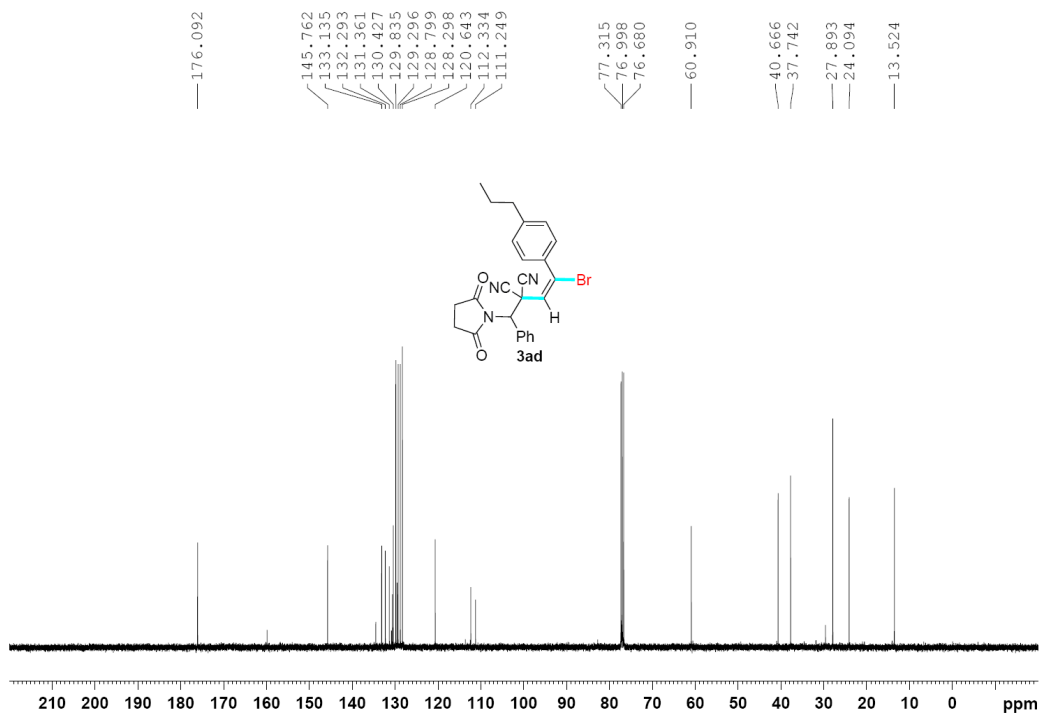

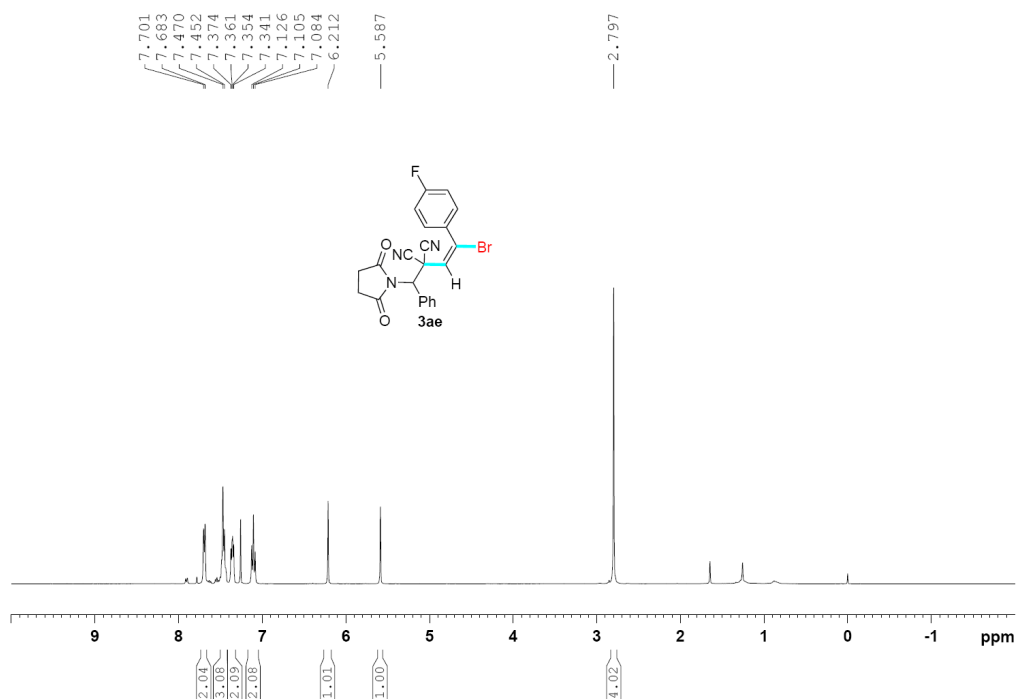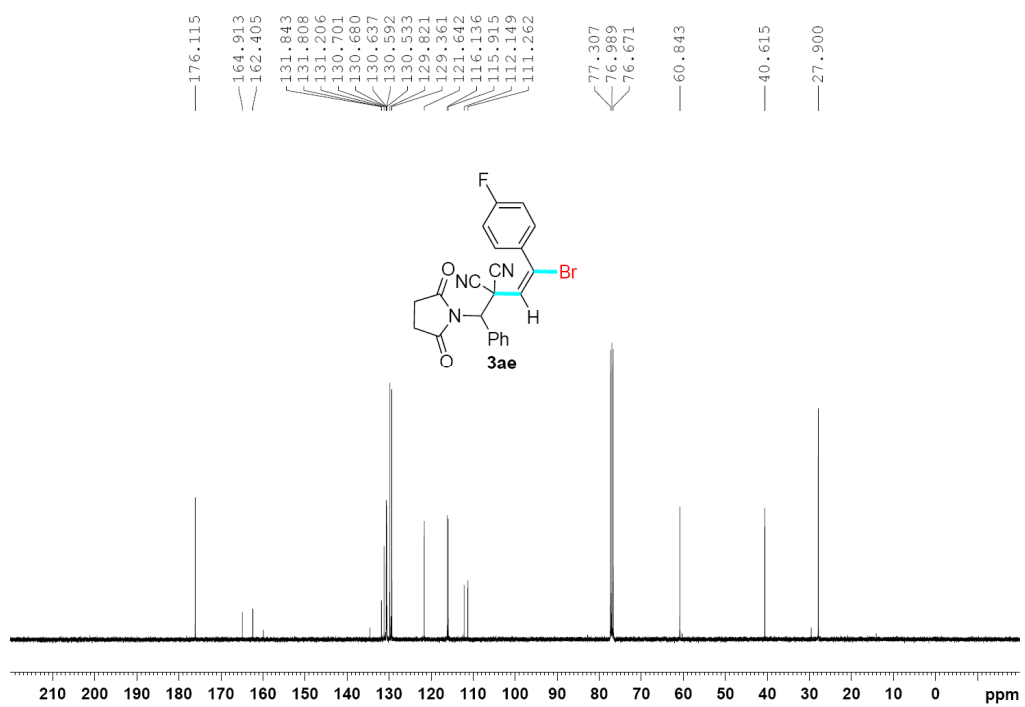

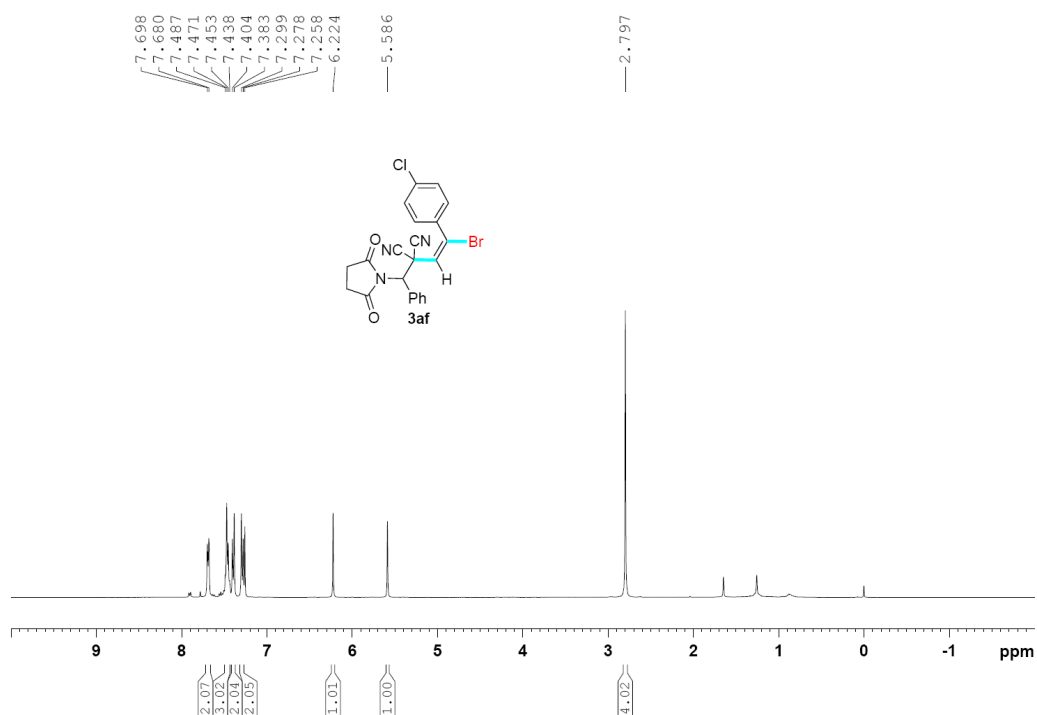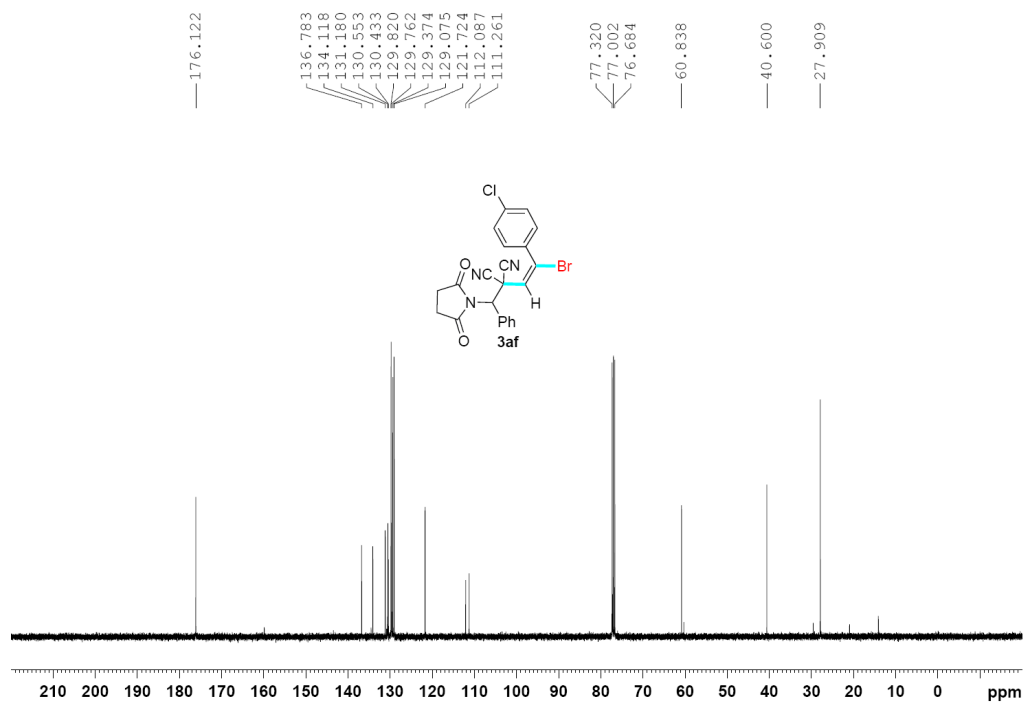

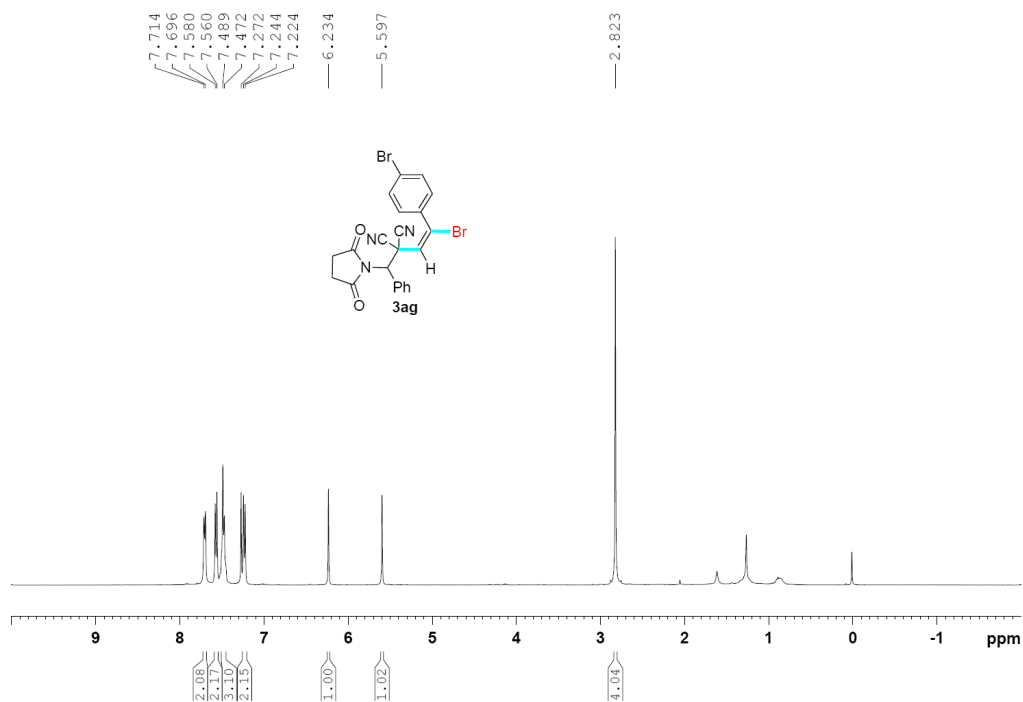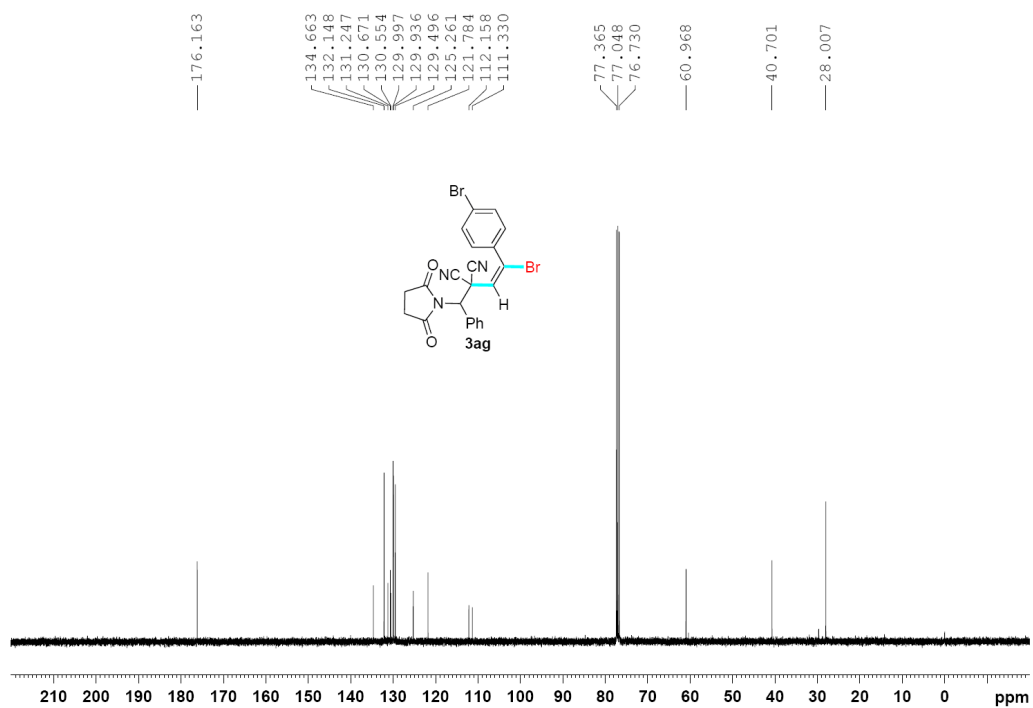

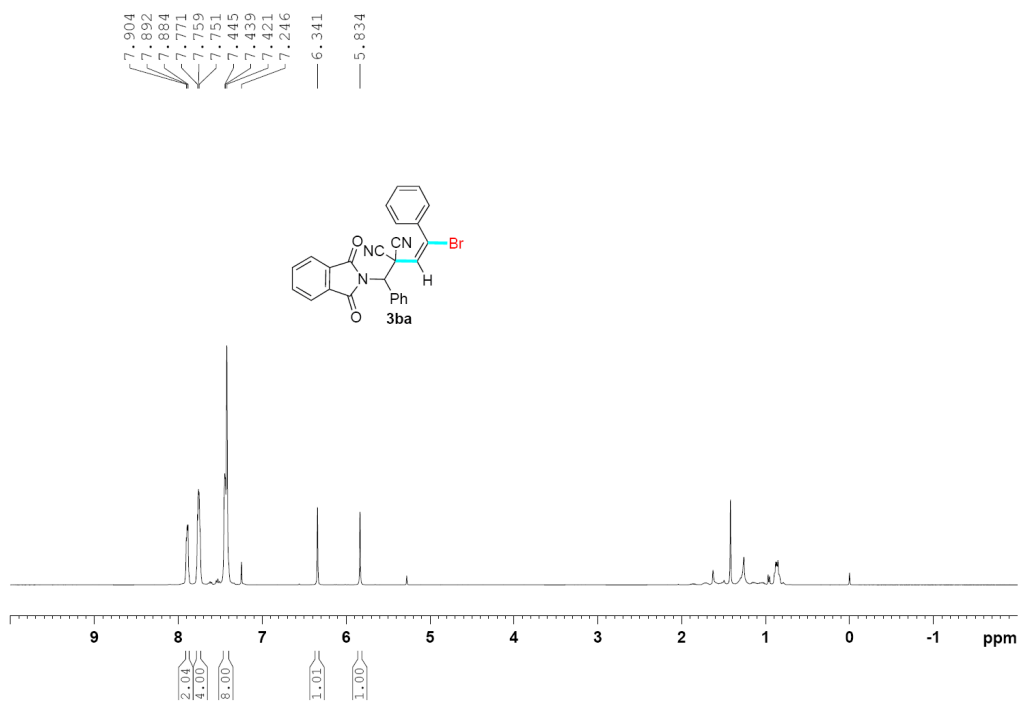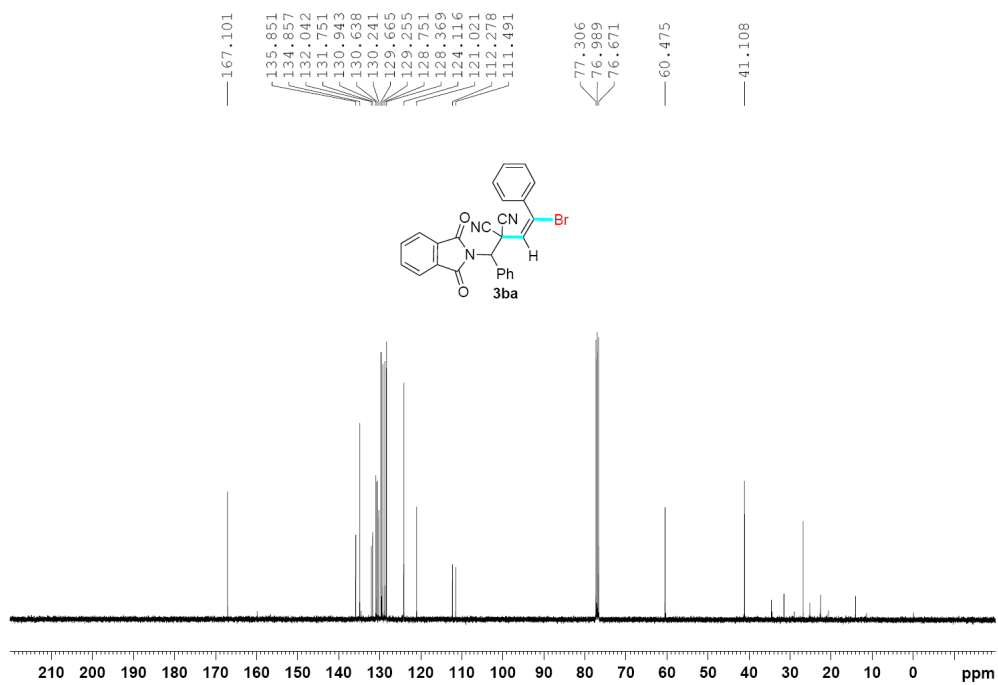

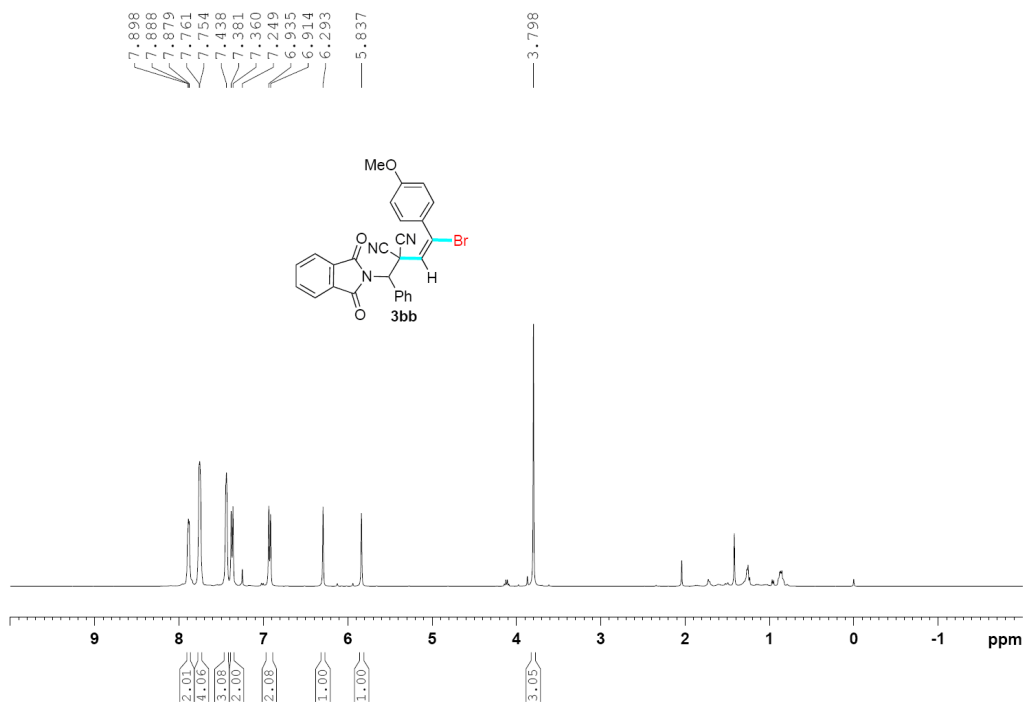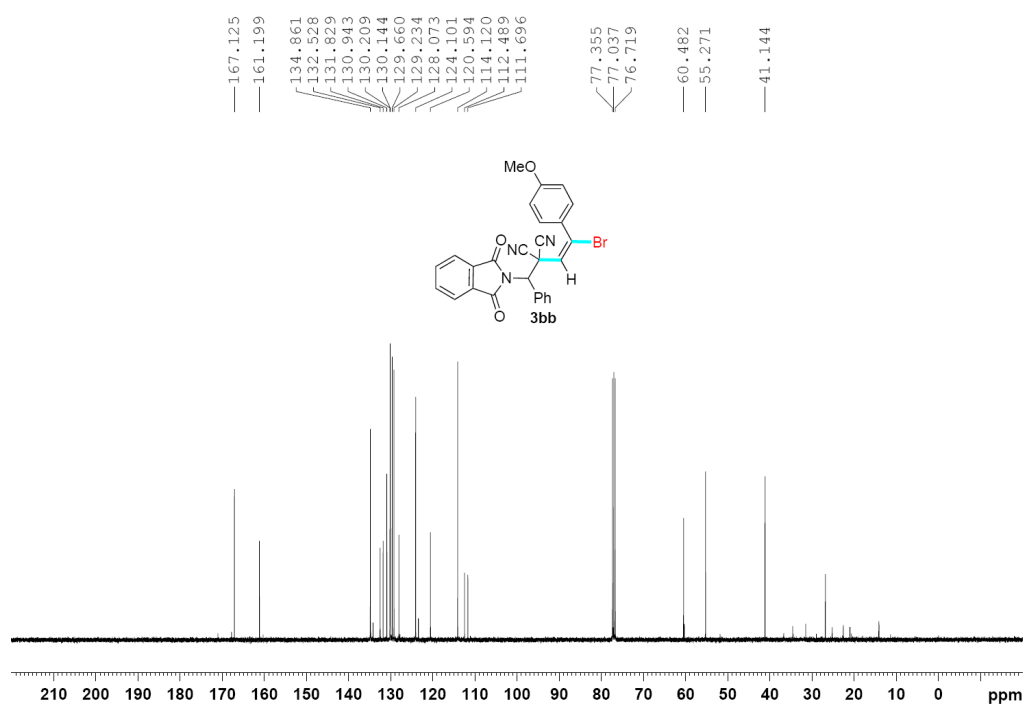

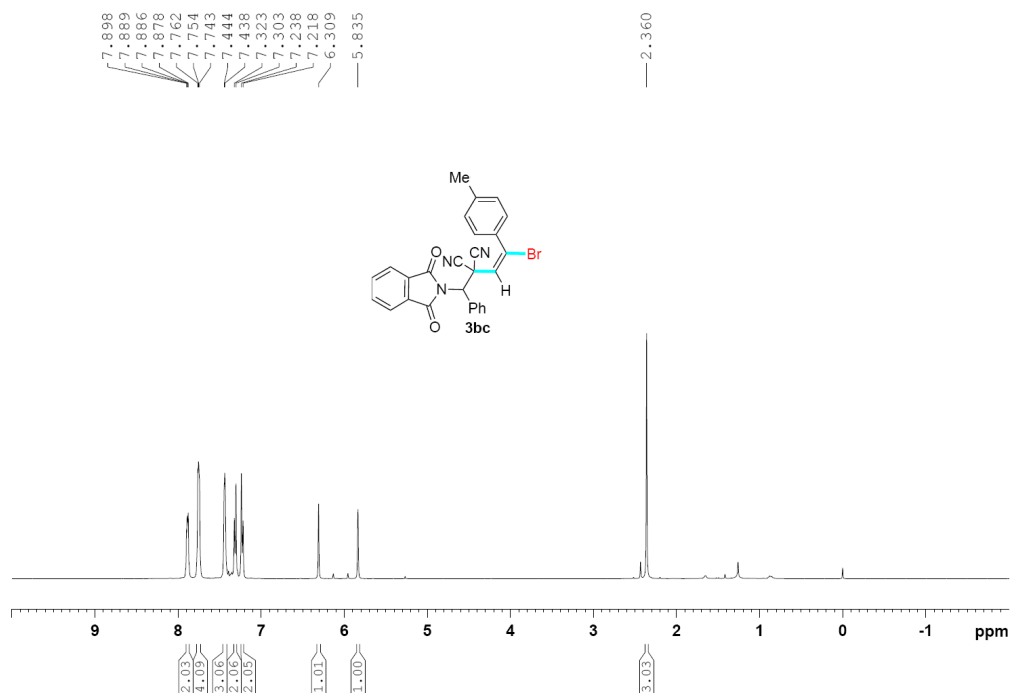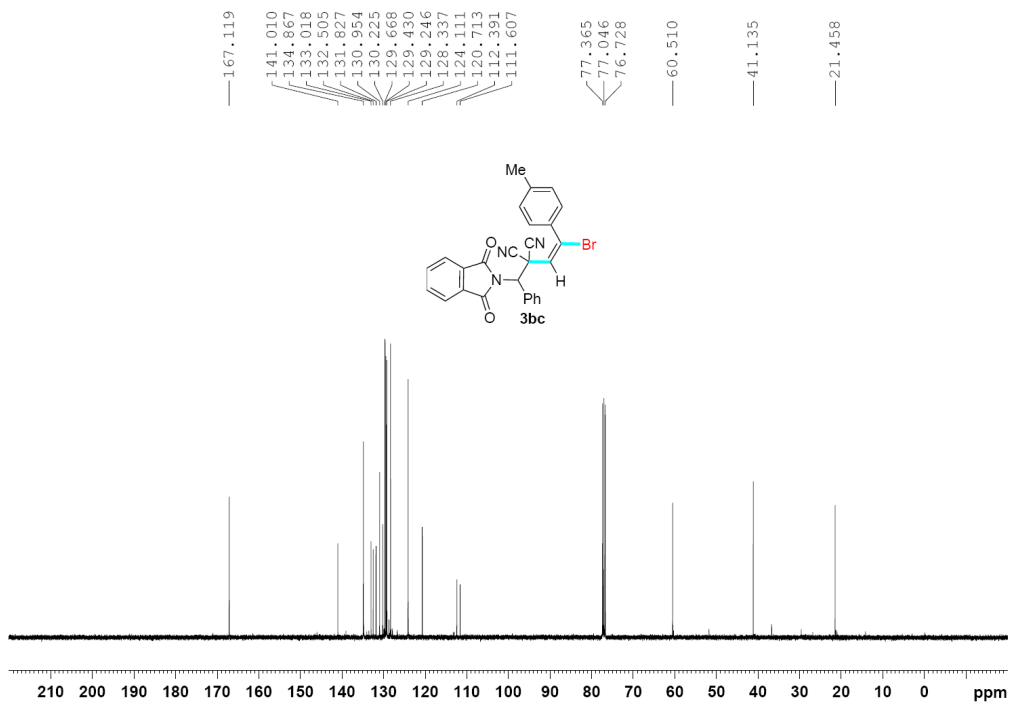

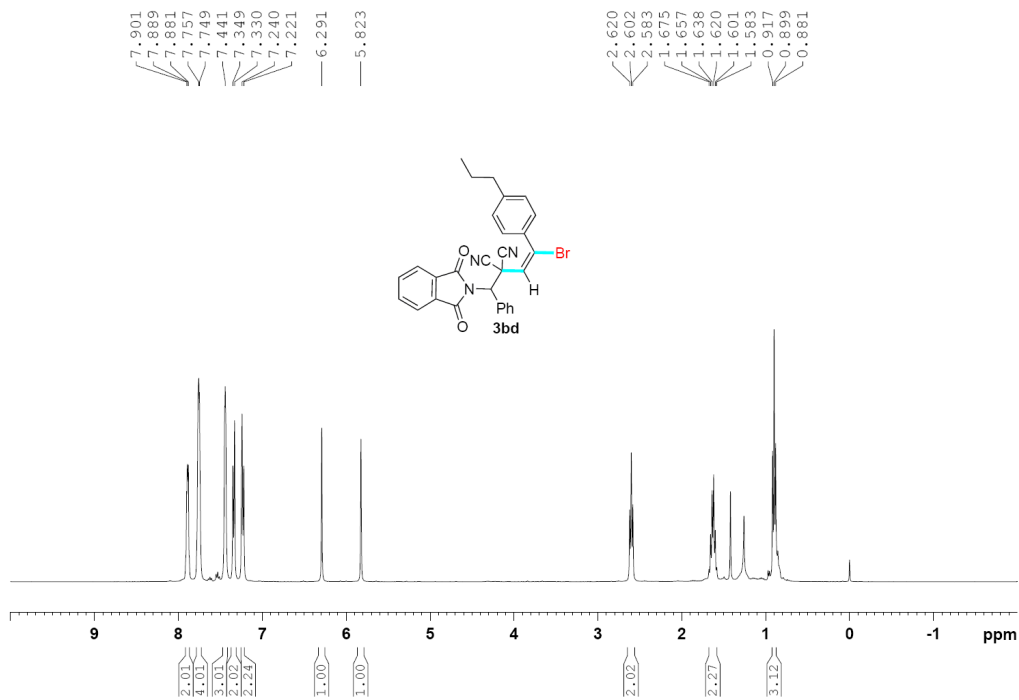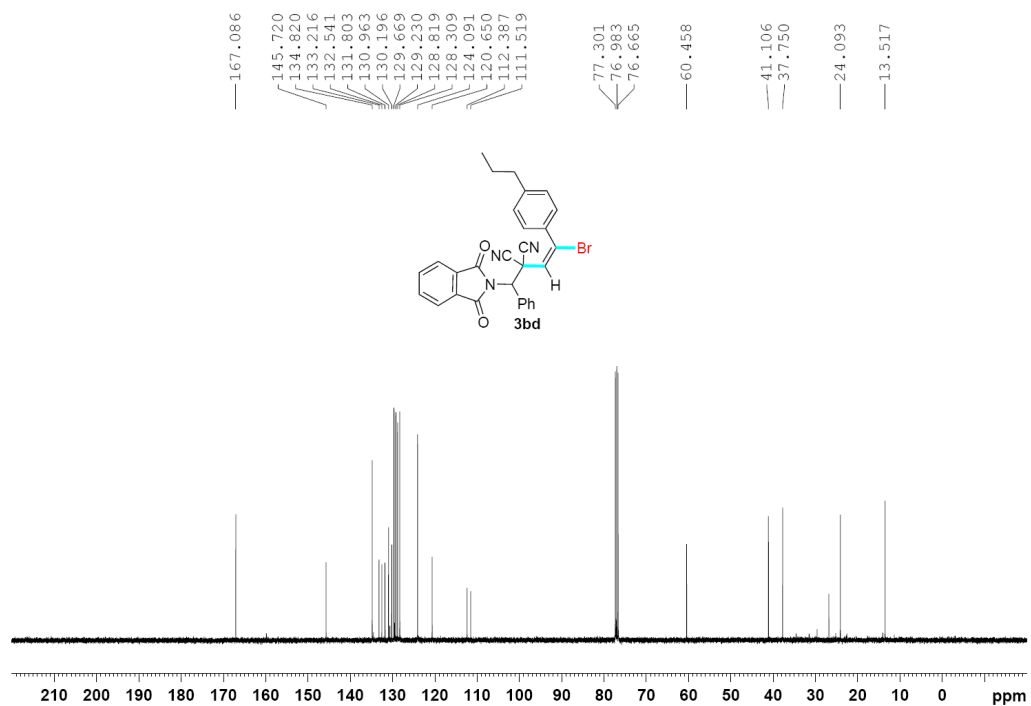

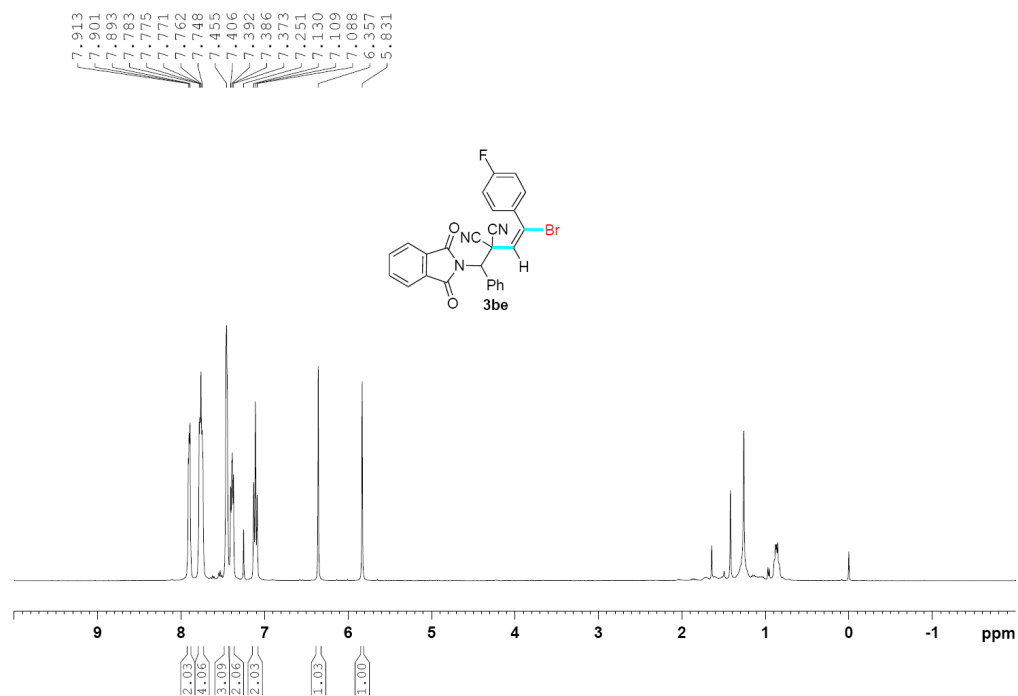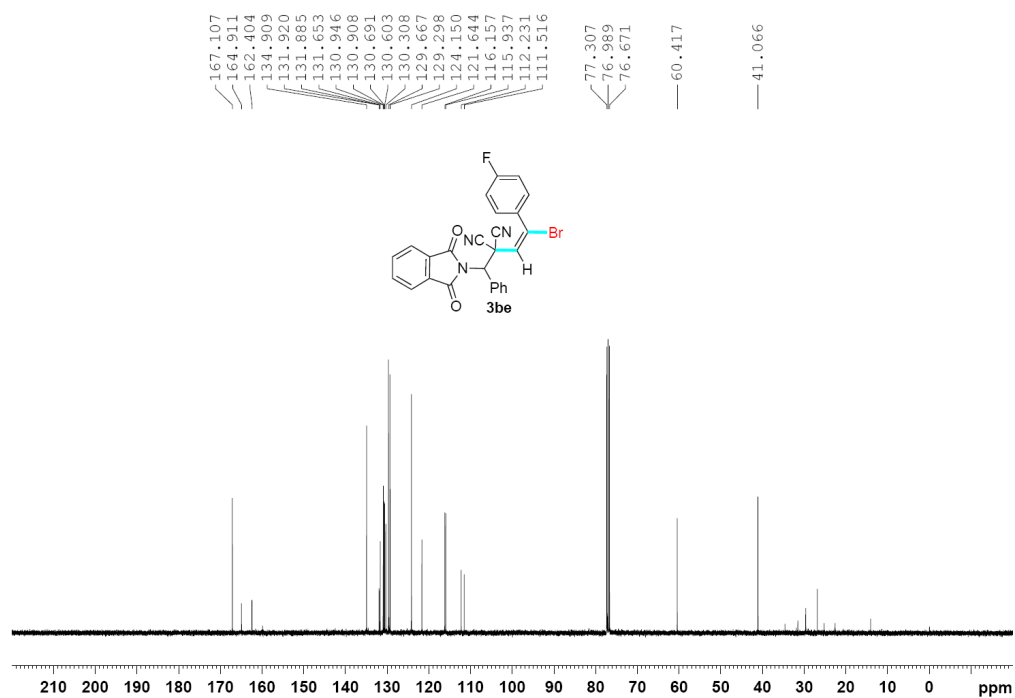

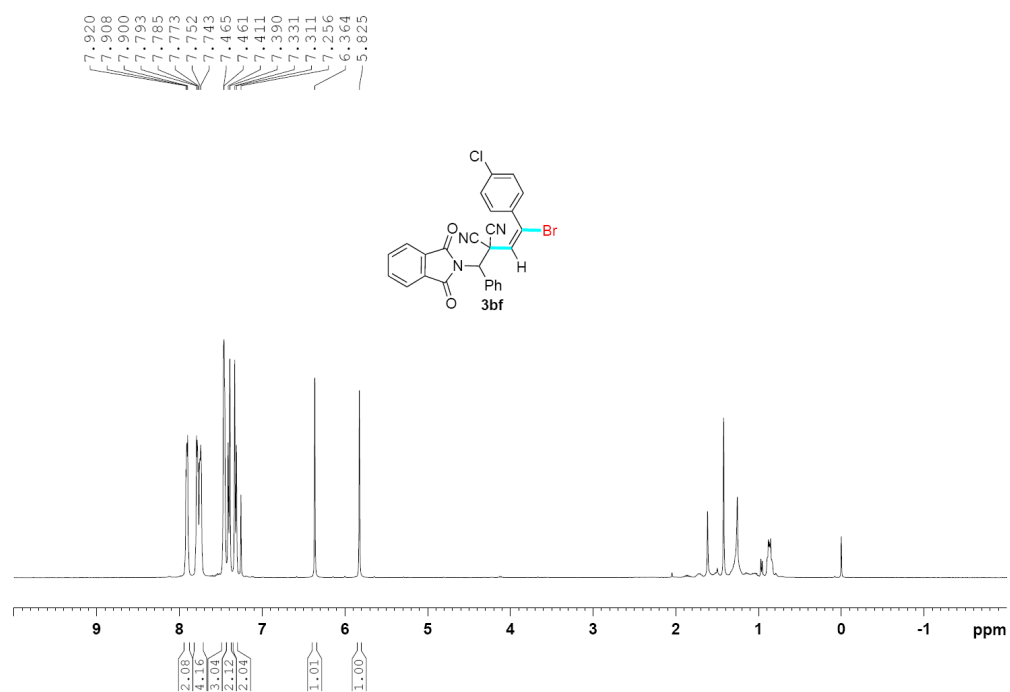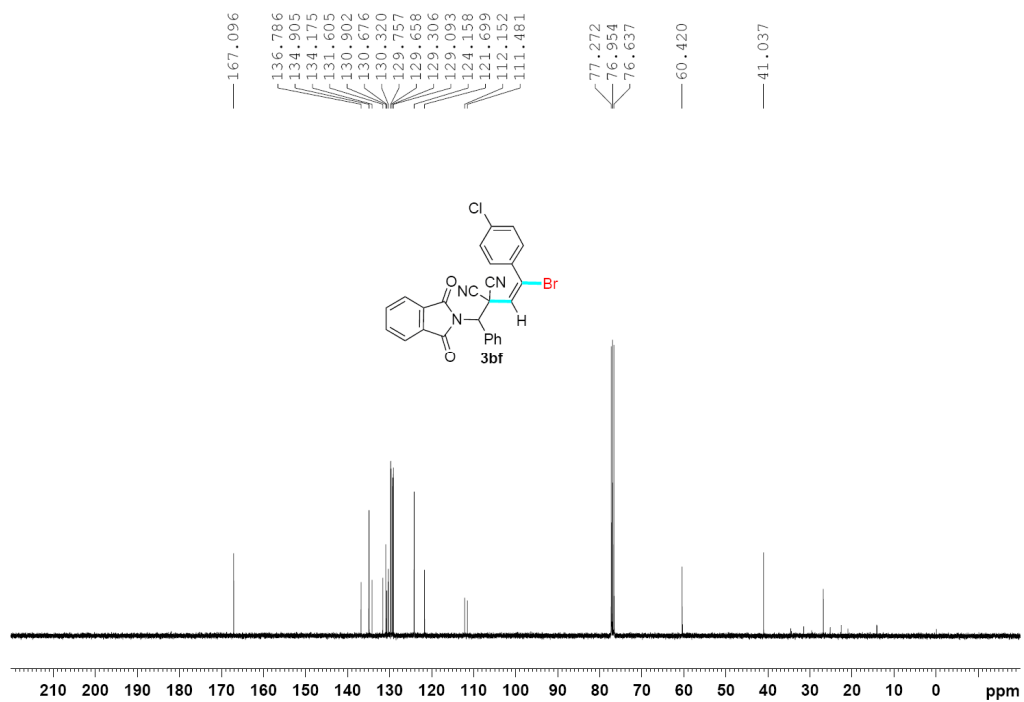

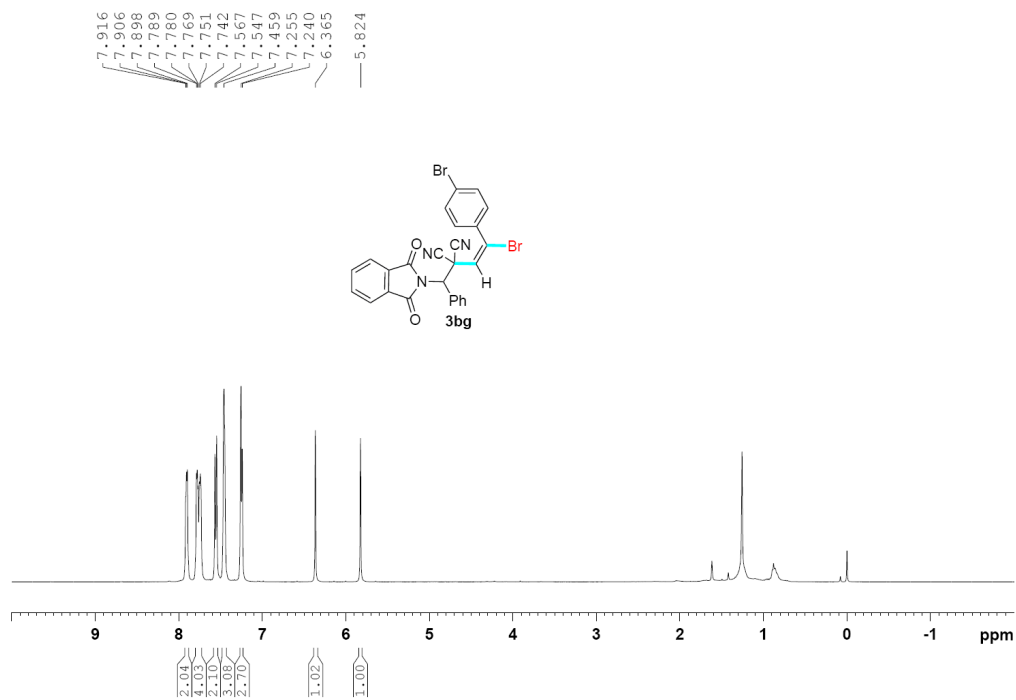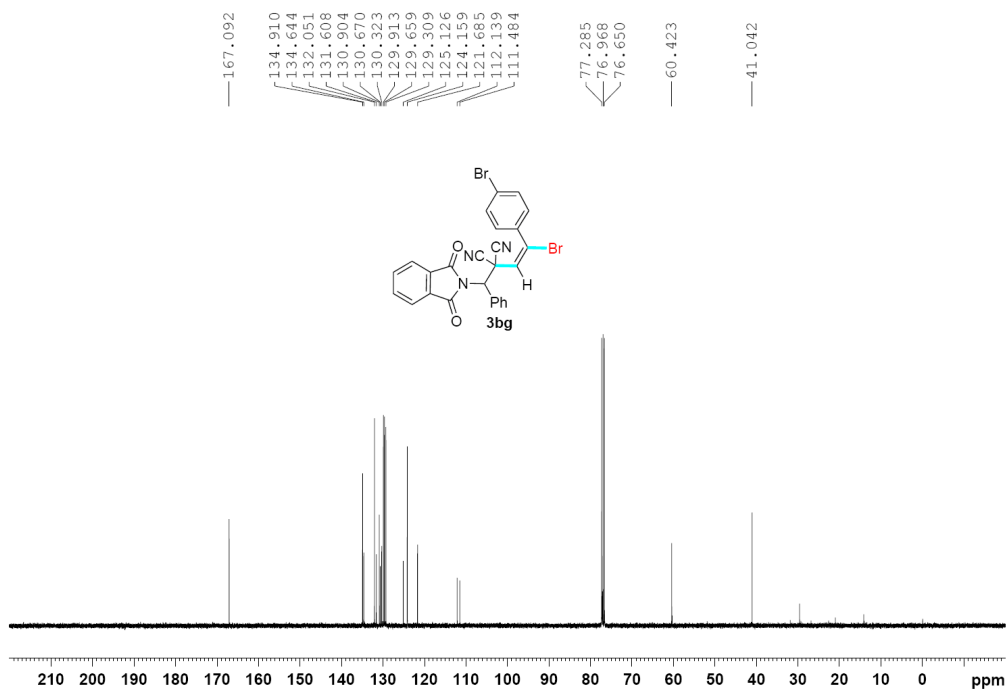

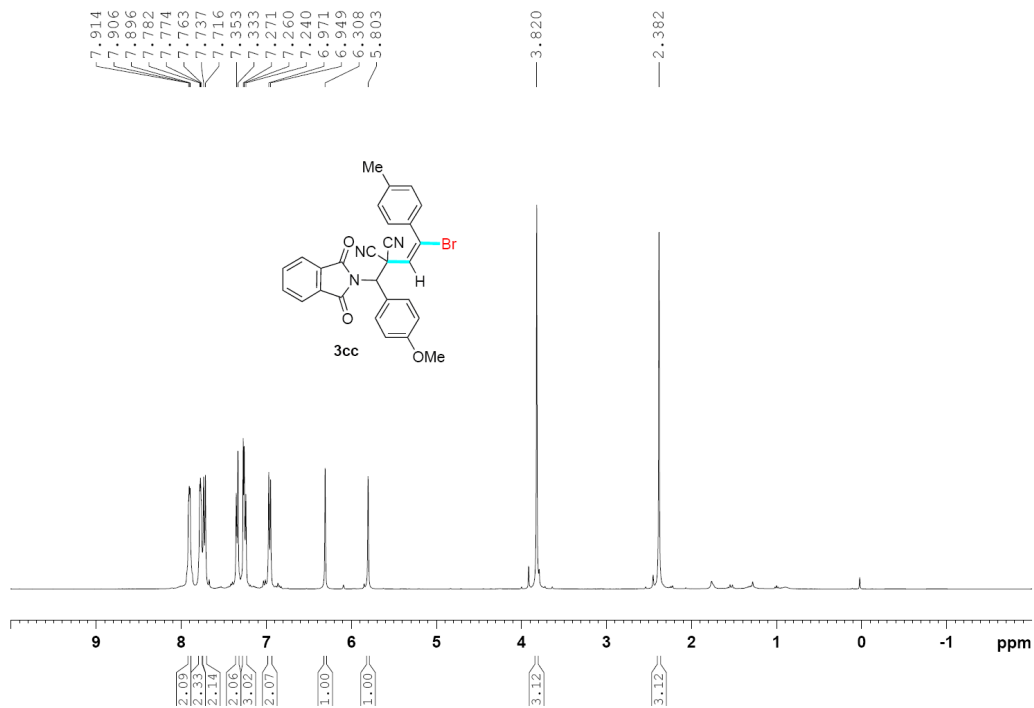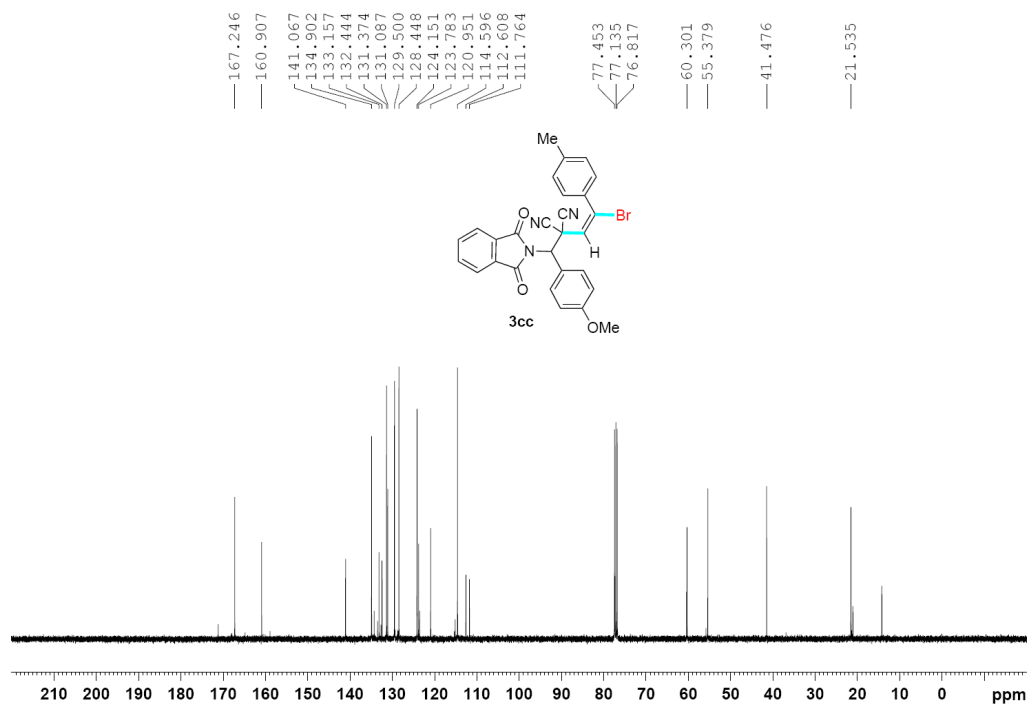

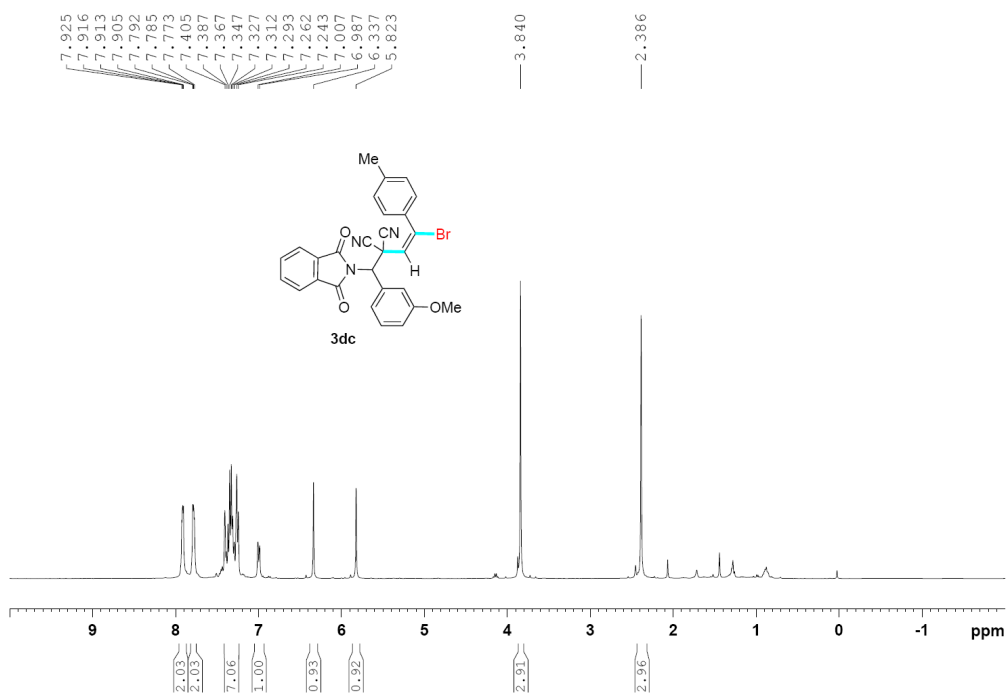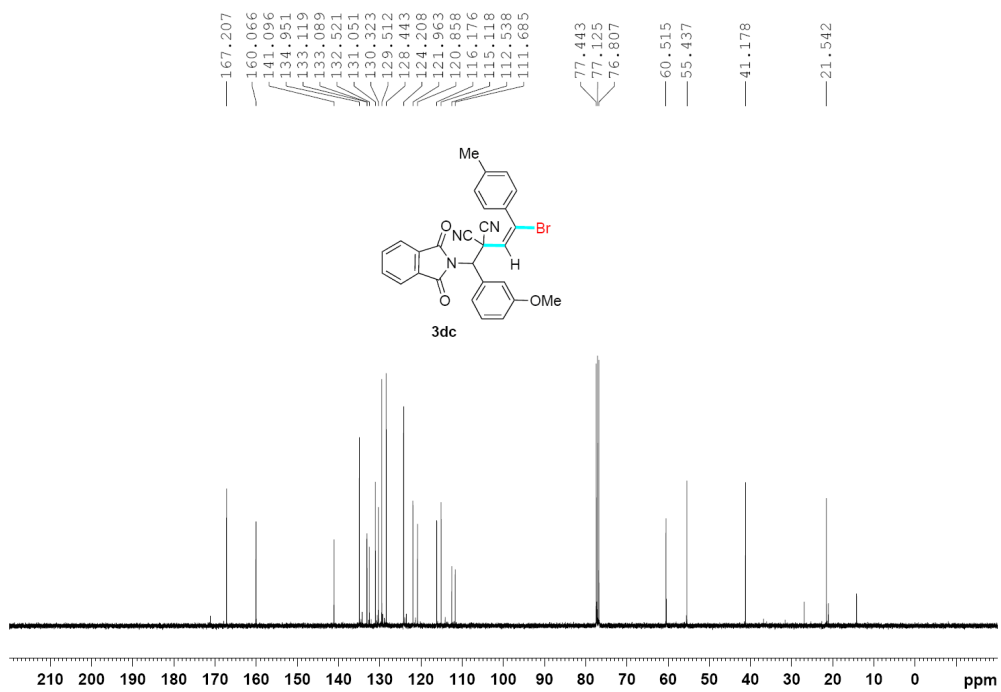

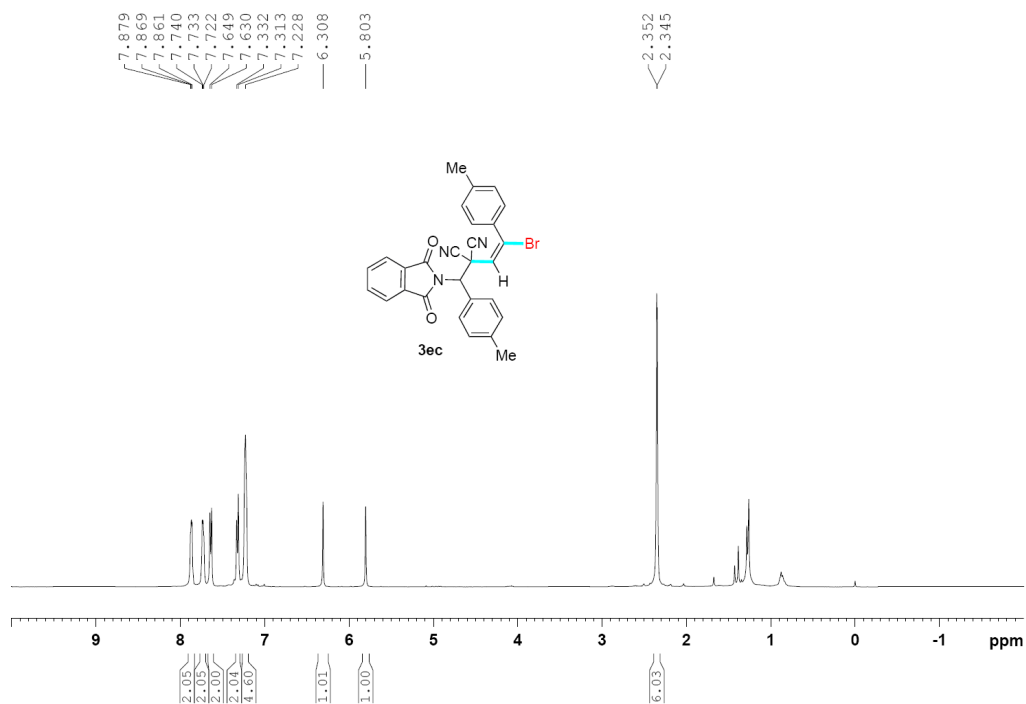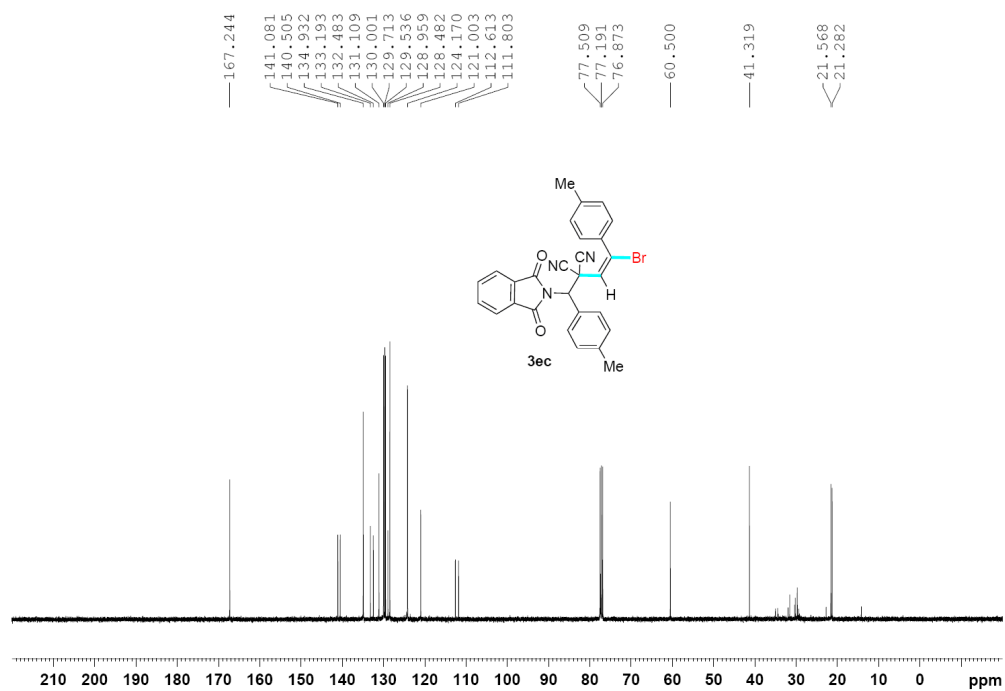

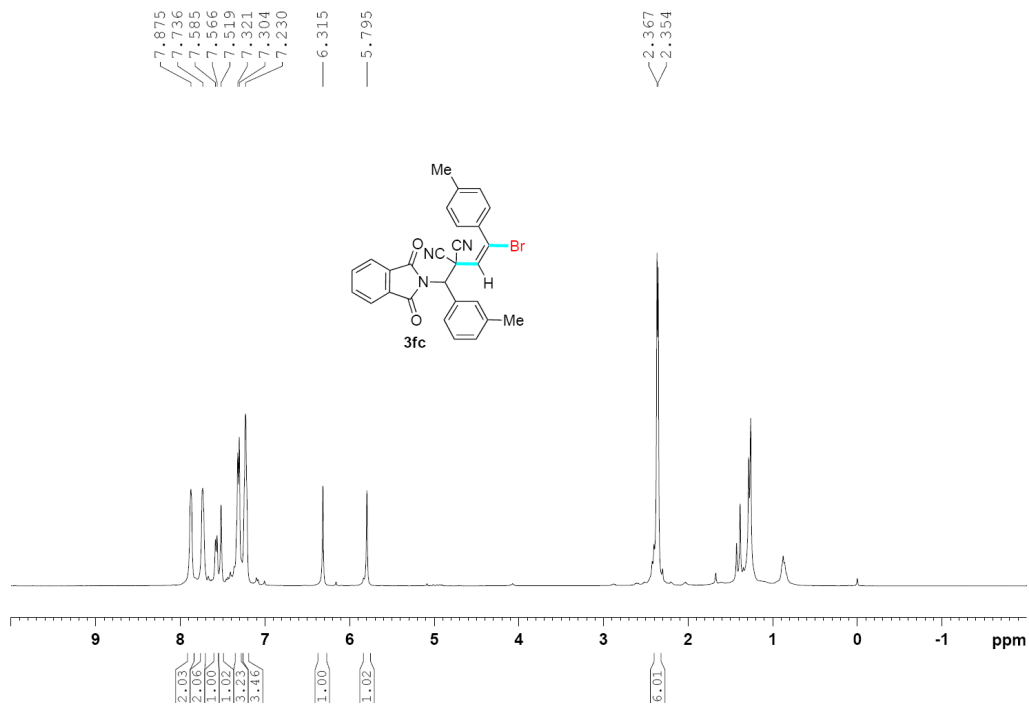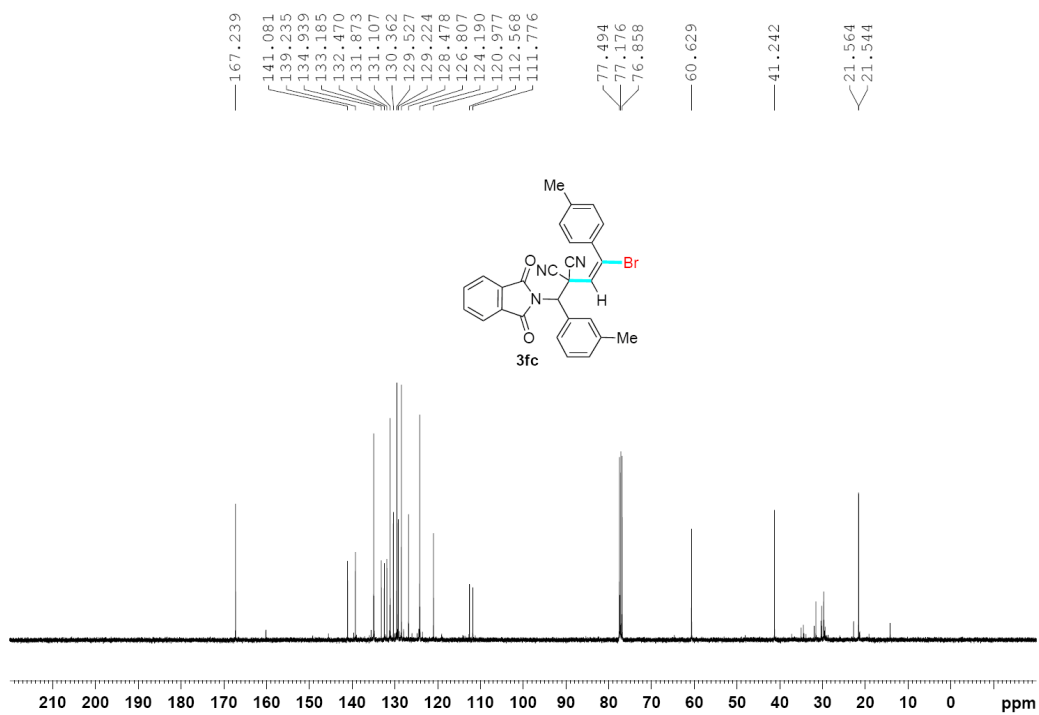

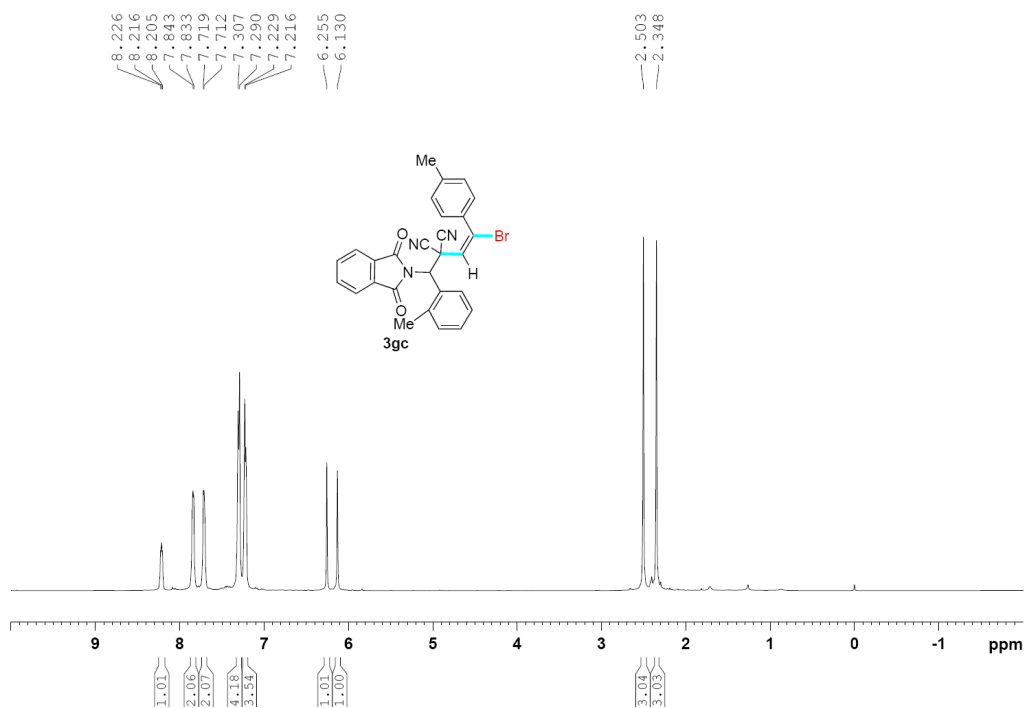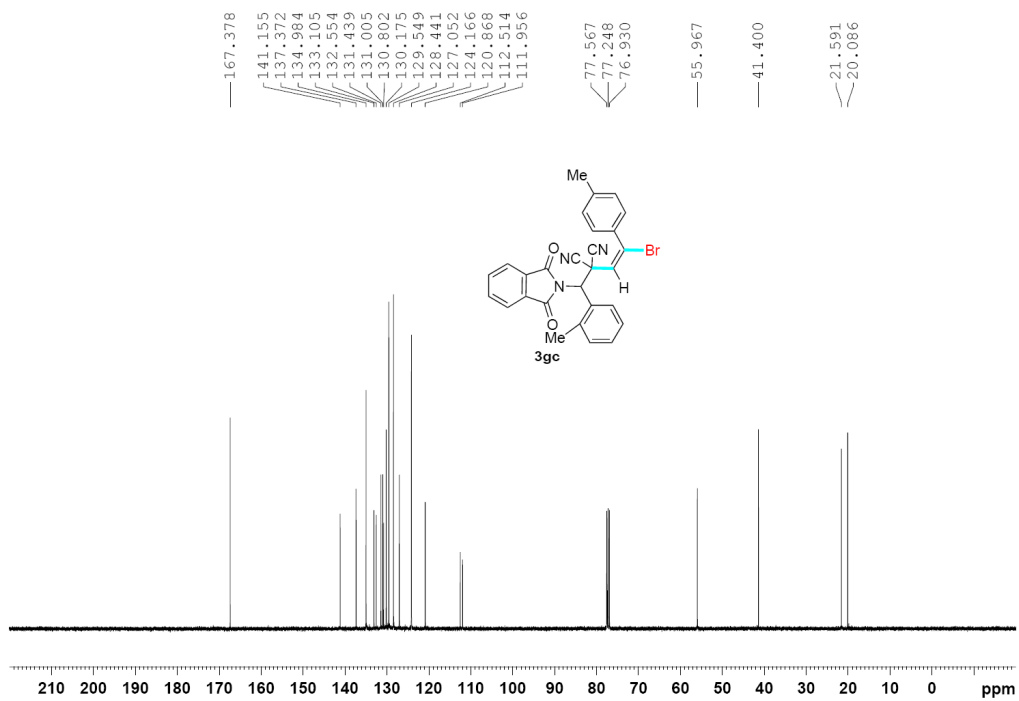

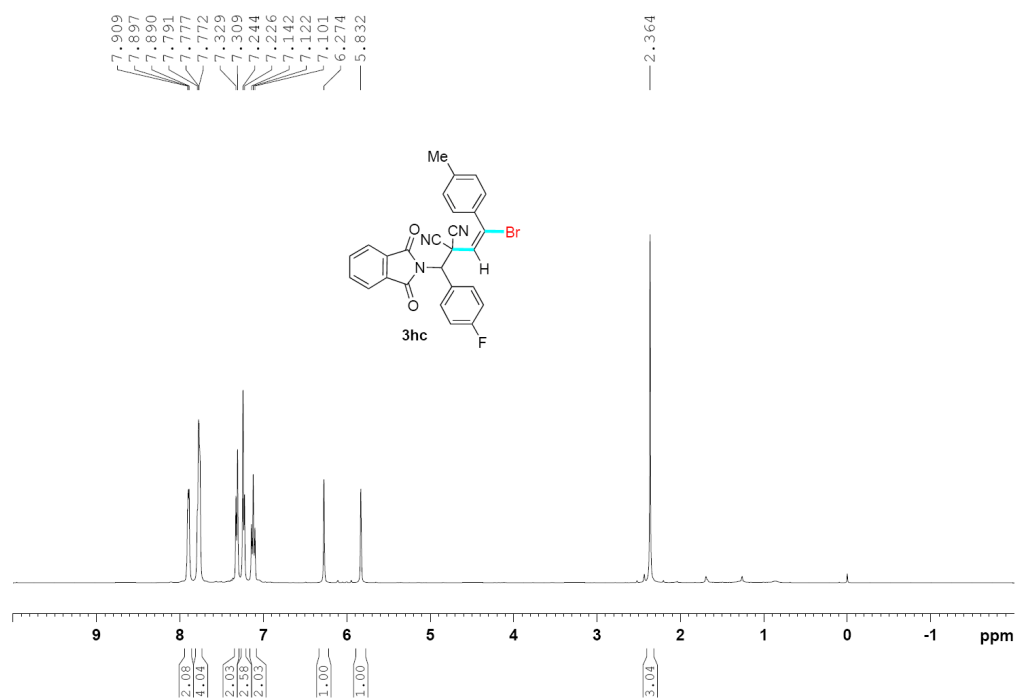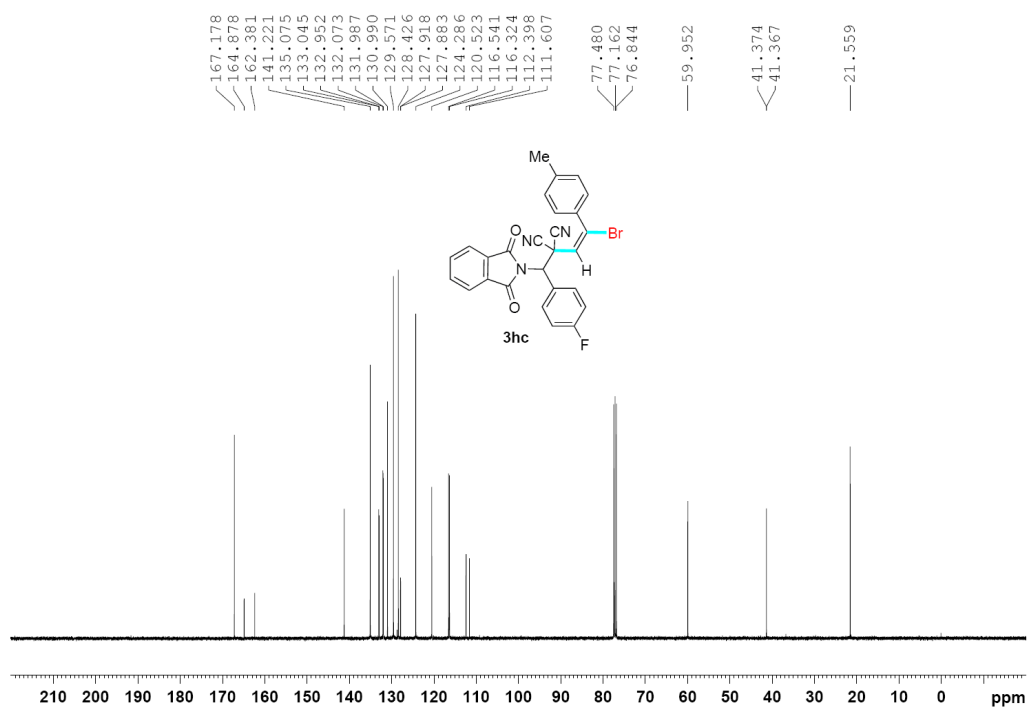

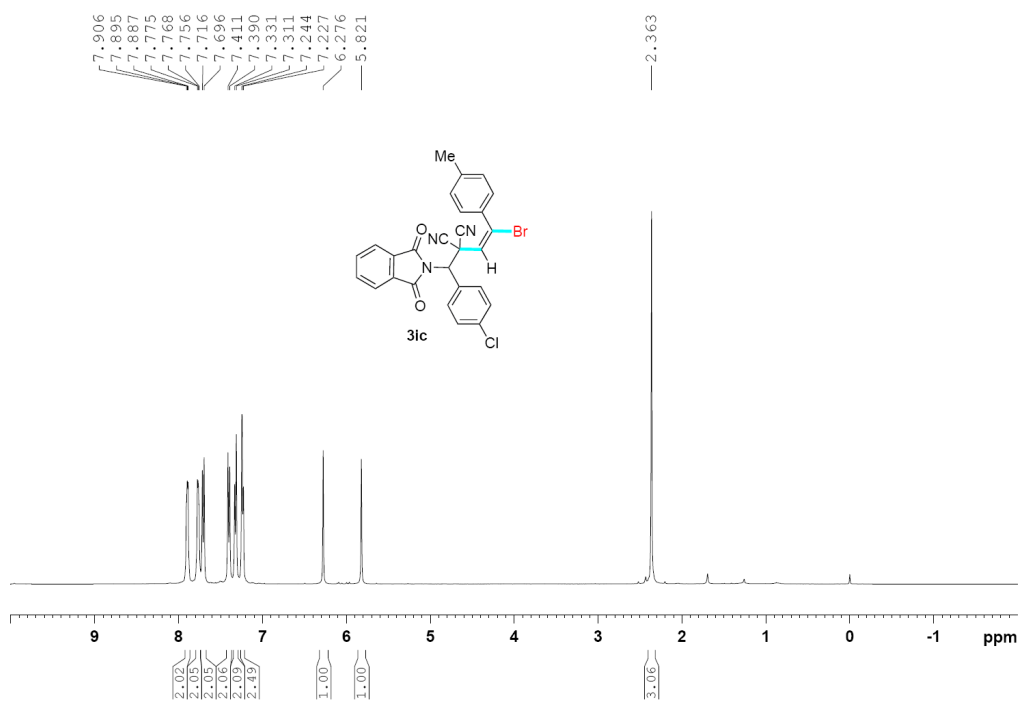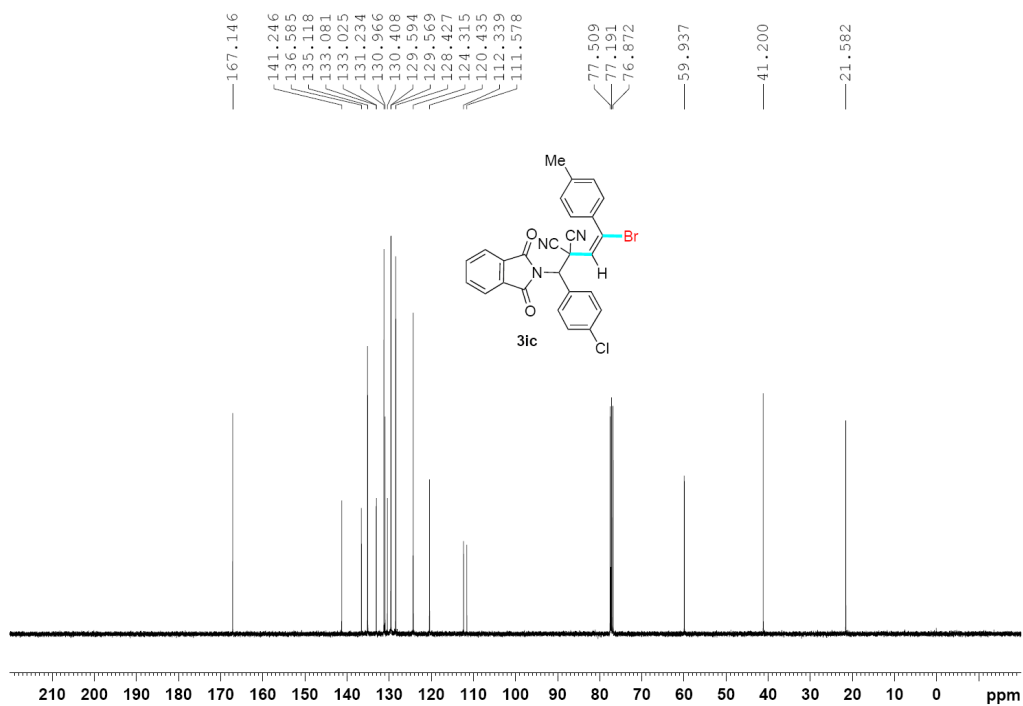

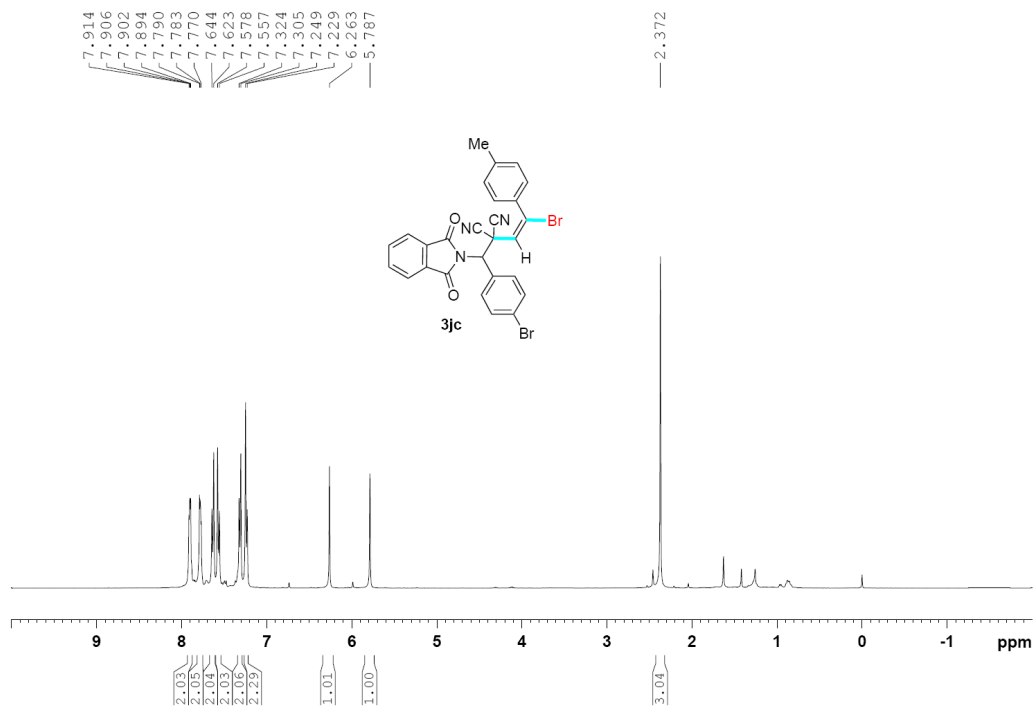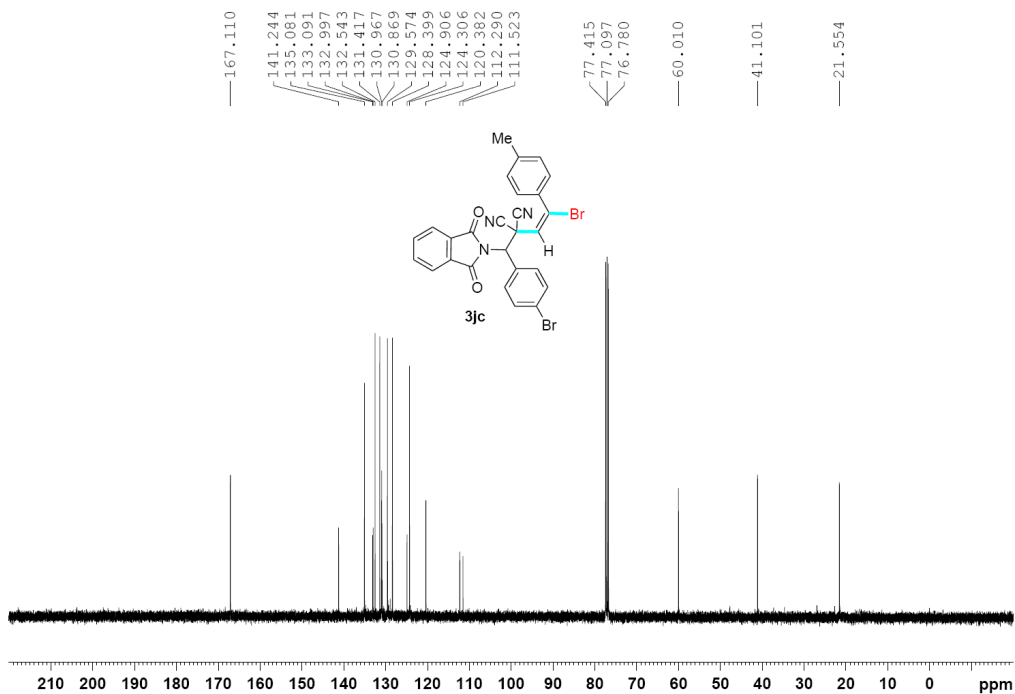

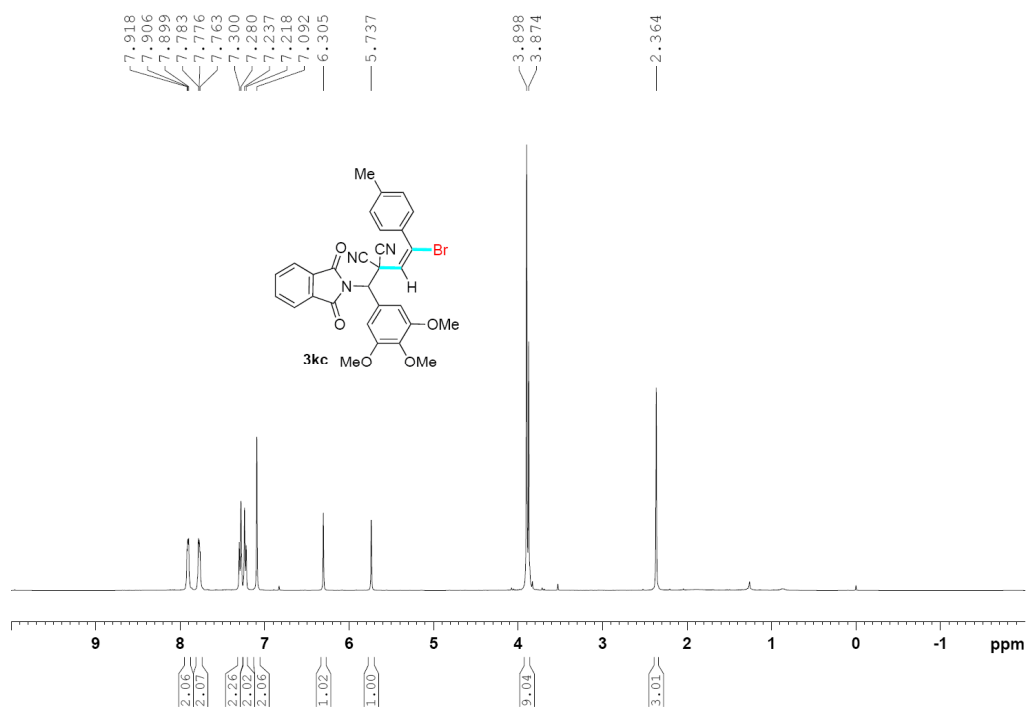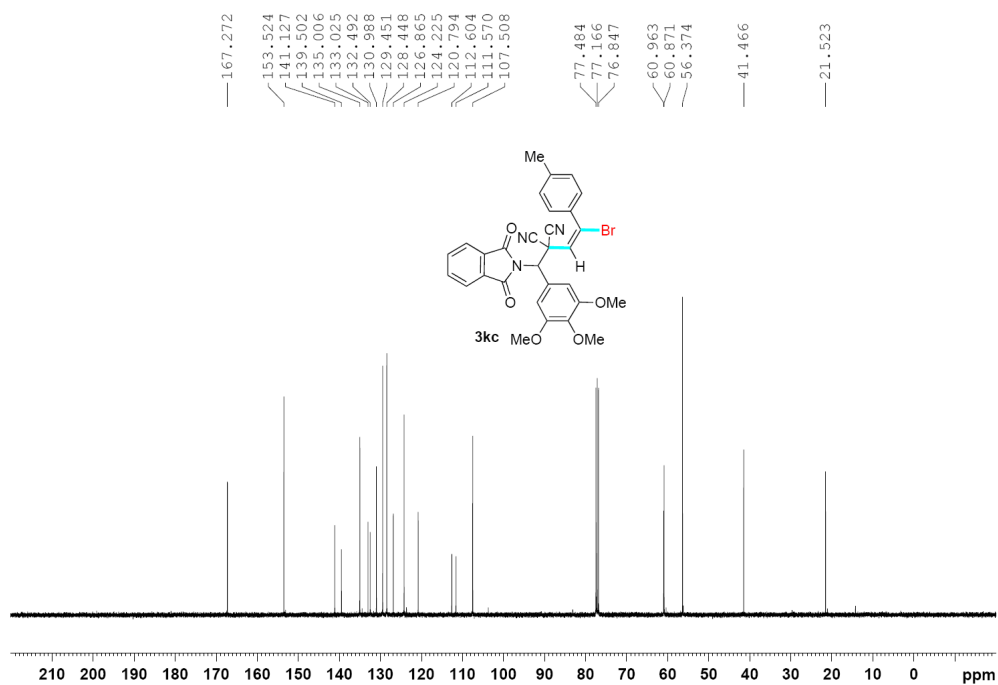

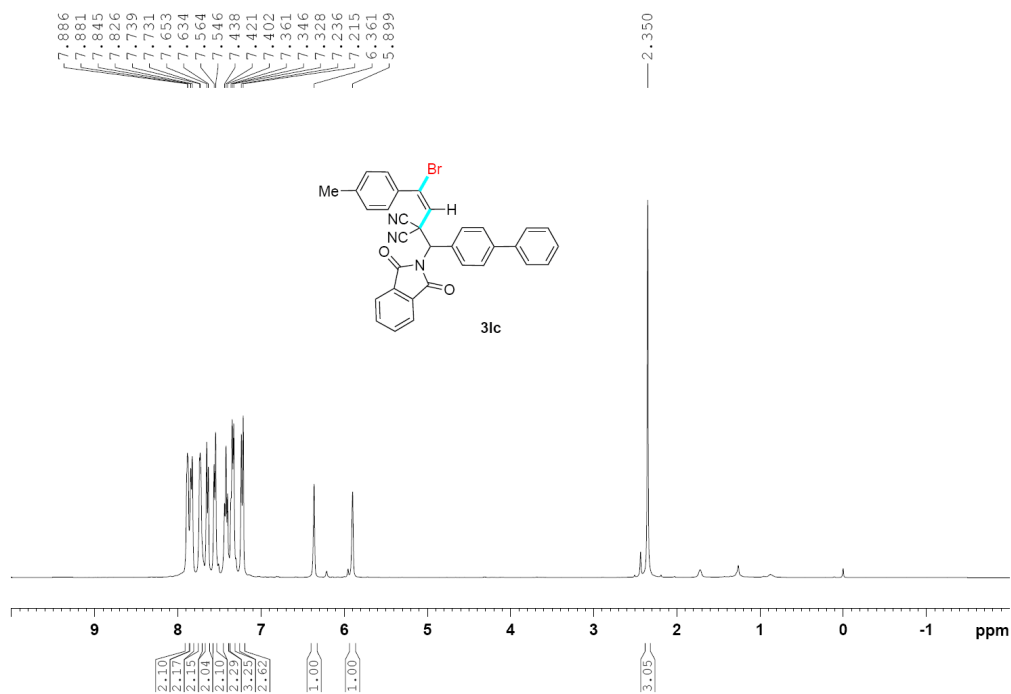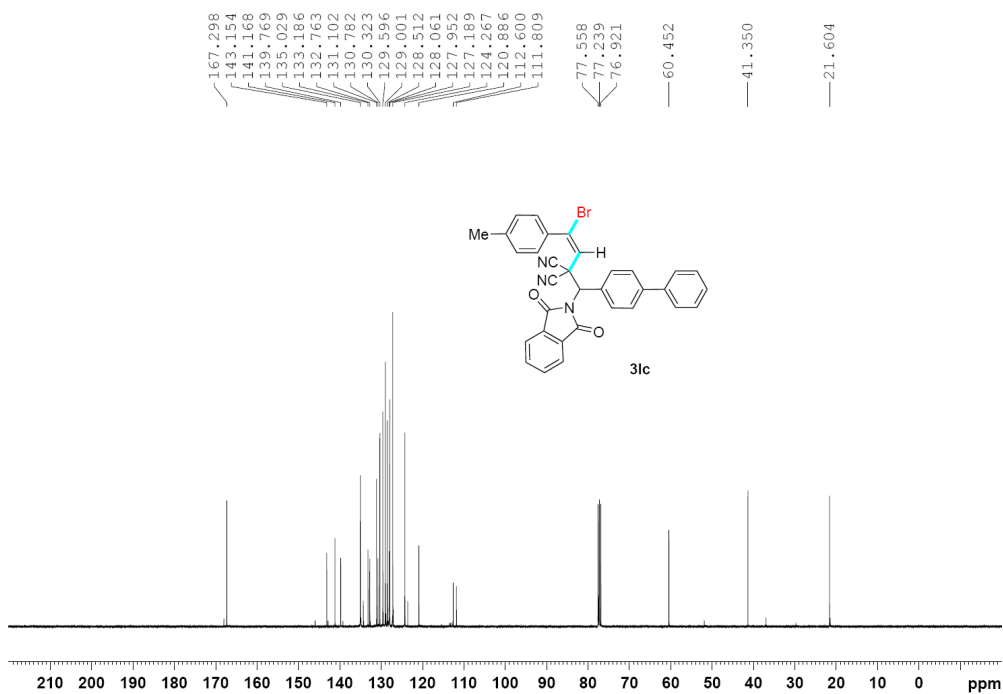

Supplement: Supplementary file 1 [file 5454014]
